1 Phylogenetic, population genetic, and morphological analyses reveal evidence for one species of  
2 Eastern Indigo Snake (*Drymarchon couperi*)

3 Brian Folt<sup>a,\*</sup>, Javan Bauder<sup>b,c</sup>, Stephen Spear<sup>b,d</sup>, Dirk Stevenson<sup>b</sup>, Michelle Hoffman<sup>e</sup>, Jamie  
4 Oaks<sup>a</sup>, Christopher Jenkins<sup>b</sup>, David Steen<sup>a</sup>, and Craig Guyer<sup>a,1</sup>

5 <sup>a</sup>Department of Biological Sciences and Auburn University Museum of Natural History, 331  
6 Funchess Hall, Auburn University, Alabama 36849, U.S.A.

7 <sup>b</sup>The Orianne Society, 11 Fruitstand Lane, Tiger, Georgia 30576, U.S.A.

8 <sup>c</sup>Department of Environmental Conservation, University of Massachusetts, Amherst,  
9 Massachusetts, U.S.A.

10 <sup>d</sup>The Wilds, Cumberland, Ohio, U.S.A.

11 <sup>e</sup>The Orianne Center for Indigo Conservation, Central Florida Zoo and Botanical Gardens, 3755  
12 NW Hwy 17-92, Sanford, Florida, 32771, U.S.A.

13 \*Corresponding author; e-mail: [brian.folt@gmail.com](mailto:brian.folt@gmail.com)

14 <sup>1</sup>Co-equal authors

15 Running title: Systematics of *Drymarchon couperi*

16

17 Abstract.—Accurate species delimitation and description are necessary to guide effective  
18 conservation management of imperiled species. The Eastern Indigo Snake (*Drymarchon couperi*)  
19 is a large species in North America that is federally-protected as Threatened under the  
20 Endangered Species Act. Recently, two associated studies hypothesized that *Drymarchon*  
21 *couperi* is two species. Here, we use diverse approaches to test the two-species hypothesis for *D.*  
22 *couperi*. Our analyses reveal that (1) phylogenetic reconstruction in Krysko et al. (2016a) was  
23 based entirely on variance of mitochondrial DNA sequence data, (2) microsatellite data  
24 demonstrate significant nuclear gene flow between mitochondrial lineages and a clear isolation-

25 by-distance pattern across the species' entire range, and (3) morphological analyses recover a  
26 single diagnosable species. Our results reject recent conclusions of Krysko et al. (2016a,b)  
27 regarding species delimitation and taxonomy of *D. couperi*, and we formally place *Drymarchon*  
28 *kolpobasileus* into synonymy with *D. couperi*. We suggest inconsistent patterns between  
29 mitochondrial and nuclear DNA may be driven by high dispersal of males relative to females.  
30 We caution against species delimitation exercises when one or few loci are used without  
31 evaluation of contemporary gene flow, particularly species with strong sex-biased dispersal (e.g.,  
32 squamates) and/or when results have implications for ongoing conservation efforts.

33

34 ADDITIONAL KEYWORDS: Coastal Plain – Conservation – *Drymarchon couperi* –  
35 *Drymarchon kolpobasileus* – Gene Flow – Population Genetics – Repatriation – Taxonomy.

36

37

## INTRODUCTION

38 Accurate species delimitation and description are critical not only for understanding  
39 global patterns of biodiversity, but also to guide effective conservation strategies (Avice, 1989;  
40 Agapow *et al.*, 2004; Mace, 2004; Frankham *et al.*, 2012). For example, species are often  
41 delimited into multiple species on the basis of systematic studies utilizing molecular genetic data,  
42 thereby requiring adjustment of existing conservation management plans (e.g., Daugherty *et al.*,  
43 1990). When species delimitation methods fail to correctly diagnose individuals (*sensu* Ghiselin,  
44 1997), such errors can have significant consequences for conservation and management of  
45 imperiled species by reducing or diverting finite conservation resources (Agapow *et al.*, 2004).  
46 Therefore, taxonomic division into multiple species should be performed carefully and only  
47 when robust evidence supports a decision to revise. Indeed, authors have cautioned that studies

48 of species delimitation should be conservative, because “it is better to fail to delimit species than  
49 it is to falsely delimit entities that do not represent actual evolutionary lineages” (Carstens *et al.*,  
50 2013).

51 The Eastern Indigo Snake (*Drymarchon couperi* Holbrook, 1842) is a large colubrid of  
52 the Coastal Plain of the southeastern United States. However, *D. couperi* populations have  
53 declined precipitously over the last century, largely due to habitat loss, habitat fragmentation,  
54 and historical over-collecting for the pet trade (U.S. Fish and Wildlife Service, 1982, 2008). As a  
55 result of these declines, *D. couperi* is listed as Threatened under the U.S. Endangered Species  
56 Act (U.S. Fish and Wildlife Service, 1978, 2008). Potentially viable populations of *D. couperi*  
57 remain in large contiguous habitats in southeastern Georgia (Stevenson *et al.*, 2009; Hyslop *et*  
58 *al.*, 2011; Enge *et al.*, 2013), and throughout peninsular Florida (Breininger, Legare & Smith,  
59 2004; Enge *et al.*, 2013), but the species was likely extirpated from Mississippi, Alabama, and  
60 the Florida panhandle (Enge *et al.*, 2013).

61 Current conservation management plans for *D. couperi* were developed under the  
62 hypothesis that *D. couperi* represents a single species. However, this hypothesis was recently  
63 challenged by Krysko *et al.* (2016a), who used DNA sequence analyses to describe two genetic  
64 lineages of *D. couperi* – an Atlantic lineage, including populations in southeastern Georgia and  
65 eastern peninsular Florida, and a Gulf lineage of populations in western and southern peninsular  
66 Florida and the Florida panhandle. This phylogeographic study was followed by a second paper  
67 (Krysko *et al.*, 2016b) that analyzed morphological variation between the Atlantic and Gulf  
68 lineages and provided an official description of the Gulf lineage as a purported novel species, the  
69 Gulf Coast Indigo Snake (*Drymarchon kolpobasileus* Krysko, Granatosky, Nuñez, Smith 2016).

70           Given the conservation status of *D. couperi* (*sensu lato*), these results have potentially  
71 important consequences for conservation of Eastern Indigo Snakes. First, division of *D. couperi*  
72 (*sensu lato*) into two smaller-ranged species results in two species with substantially smaller  
73 population sizes that are, therefore, at greater risk of extinction (*sensu* Agapow *et al.*, 2004; e.g.,  
74 Pauly, Piskurek & Shaffer, 2007). Second, conservation and recovery of two rare species  
75 requires more time and funds than one; both resources are in short supply. Finally, as noted by  
76 Krysko *et al.* (2016a), active conservation management plans for *D. couperi* (*sensu lato*) include  
77 population repatriation projects in Alabama and the Florida panhandle, where populations  
78 attributed to the Gulf lineage presumably were extirpated. Repatriation projects should be  
79 informed by phylogeographic and genetic developments (Soltis and Gitzendammer, 1999). The  
80 description of *D. kolpobasileus*, therefore, causes increased logistical complexity for Eastern  
81 Indigo Snake captive breeding and repatriation projects.

82           We represent additional experts on Eastern Indigo Snake taxonomy, ecology and  
83 conservation, many of whom participated in an inter-agency workshop on Eastern Indigo Snake  
84 taxonomy referenced in Krysko *et al.* (2016a,b). During that event, consequences of the  
85 discovery that Eastern Indigo Snakes comprise two genetic lineages were debated, and this  
86 debate was used to inform conservation plans for the species. Skepticism was voiced that the two  
87 lineages represent diagnosable species based largely on description of microsatellite data  
88 documenting widespread admixture of the lineages. Here, we repeat that debate by using  
89 multiple approaches to evaluate the hypothesis that *D. couperi* comprises two distinct species  
90 (Krysko *et al.*, 2016b). First, we review mitochondrial and nuclear DNA sequence analyses  
91 presented by Krysko *et al.* (2016a) as well as morphological data presented by Krysko *et al.*  
92 (2016b) and describe limitations of those data and analyses. Second, we analyze a novel

93 microsatellite DNA dataset and test for evidence of contemporary gene flow between the two  
94 genetic lineages identified by Krysko *et al.* (2016a). Third, we provide new analyses of  
95 morphological data collected from 125 Eastern Indigo Snakes, including individuals from both  
96 genetic lineages of Krysko *et al.* (2016a). Specifically, we evaluate the diagnostic features of  
97 head and scale shape presented by Krysko *et al.* (2016b). Last, we review features of the life  
98 history of *D. couperi* and suggest how they inform interpretations of genetic data.

99

## 100 REVIEW OF PUBLISHED DATA

### 101 GENE SEQUENCE ANALYSIS

102 To infer evolutionary history among populations of *D. couperi (sensu lato)*, Krysko *et al.*  
103 (2016a) analyzed sequence data obtained from three genetic markers: the mitochondrial  
104 (mtDNA) genes cytochrome *b* (CytB) and nicotinamide adenine dinucleotide dehydrogenase  
105 subunit 4 (ND4) and the nuclear gene neurotrophin-3 (NT3). Because CytB and ND4 are linked  
106 components within the non-recombinant and maternally-inherited mitochondrial genome, we  
107 note that those two markers are linked on a single locus. The authors estimated phylogenetic  
108 relationships among populations by analyzing a concatenated dataset including both  
109 mitochondrial and nuclear loci. These data were evaluated with maximum likelihood (ML) and  
110 Bayesian analyses; for the Bayesian analysis, the dataset was partitioned such that nucleotide  
111 substitution was modeled separately for each locus. Because both analyses generated similar  
112 phylogenetic hypotheses, the authors described results only from the Bayesian analysis.

113 Phylogenetic analyses of a single or few genetic loci frequently describe evolutionary  
114 patterns that do not reflect the organism's true evolutionary history (i.e., the gene tree/species  
115 tree problem; Avise *et al.*, 1983; Funk, 1999; Funk and Omland, 2003; Dupuis, Roe & Sperling,

116 2012). In particular, use of and reliance on mtDNA for phylogenetic and taxonomic analyses has  
117 been criticized because mtDNA has a vastly different natural history than the primary mode of  
118 genetic inheritance, nuclear DNA (nDNA). Mitochondrial DNA has a lower effective population  
119 size, higher mutation rate, and frequently defies critical assumptions of neutral evolution by  
120 being under selection (Ballard & Whitlock, 2004; Frankham *et al.*, 2012). More importantly,  
121 mtDNA is maternally inherited and, therefore, may not describe an organism's true patterns of  
122 inheritance expressed through the nuclear genome (Ballard & Whitlock, 2004). This is  
123 particularly problematic for species with relatively low dispersal rates that are more likely to  
124 show phylogeographic breaks that are not driven by decreased gene flow but by chance alone  
125 (Irwin, 2002), or for species with intersexual differences in movement, site fidelity, or breeding  
126 behavior (Scribner *et al.*, 2001; Thorpe, Surget-Groba & Johannson, 2008; Peters, Bolender &  
127 Pearce, 2012).

128         Given these and other limitations, a customary practice in phylogenetic studies is to use  
129 both mitochondrial and nuclear loci and to describe phylogenetic patterns inferred from these  
130 two components of the genome separately (e.g., Irwin, 2002; Funk & Omland, 2003; Gamble *et*  
131 *al.*, 2008; Grismer *et al.*, 2014). This practice can help identify situations for which phylogenetic  
132 hypotheses generated from mtDNA (1) are incongruent with hypotheses from the nuclear  
133 genome and that (2) might be erroneously assumed to accurately depict the species tree.  
134 However, Krysko *et al.* (2016a) combined the mitochondrial and nuclear markers and used that  
135 concatenated dataset to infer both ML and Bayesian phylogenies from the combined datasets.  
136 Because mutation rates of mtDNA are higher than those of nDNA, phylogenetic analysis of the  
137 concatenated data will be driven by the more variable markers from the mtDNA, thus leaving  
138 their results subject to all the criticisms associated with mtDNA data (Ballard & Whitlock, 2004;

139 Frankham *et al.*, 2012). We do note that the fundamental differences between mitochondrial and  
140 nuclear DNA can be leveraged to understand interesting evolutionary history of study organisms  
141 (e.g., introgressive hybridization; Rubinoff & Holland, 2005; Grismer *et al.*, 2014; Folt *et al.*,  
142 2016). However, we also note that the analyses summarized above do not exploit these potential  
143 benefits (i.e., by comparing mitochondrial and nuclear gene trees), and we instead argue that  
144 both ML and Bayesian analyses of the Eastern Indigo Snake data are biased toward describing  
145 patterns from maternally inherited mtDNA.

146 Krysco *et al.* (2016a) used mixed-model Bayesian inference of the sequence data to infer  
147 divergence dates, population size, and migration rates over time. These authors hypothesized that  
148 the two lineages of Eastern Indigo snakes are derived from an ancestor that colonized the  
149 southeastern United States via eastward migration of *D. melanurus* along the Gulf Coast  
150 (Auffenberg, 1963). In an attempt to understand migration and gene flow between mitochondrial  
151 clades, Krysco *et al.* (2016a) described migration rates inferred from population genetic  
152 summaries of their mitochondrial analysis; the authors suggested those rates were too low to  
153 allow for homogenization of the two populations. However, estimates of migration rates between  
154 clades were derived from the same data used to define those clades. A better approach,  
155 analogous to model validation (McGarigal, Cushman & Stafford, 2000), would have been to  
156 estimate the clades and migration rates between them using two independent data sources. We  
157 suggest the authors' analysis of migration greatly limits their ability to delimit species and is  
158 problematic because coalescent theory would suggest the mitochondrial clades found by the  
159 authors would also be expected if all animals were within a single species. In a population of  
160 constant size, the two deepest branches of a gene tree are expected to comprise approximately  
161 half of the gene's history from present to the most recent common ancestor (Hudson, 1990;

162 Wakely, 2008). Furthermore, if an individual is more likely to share a more-recent common  
163 ancestor with geographically proximate individuals, these two clades, predicted by coalescent  
164 theory, will often display geographic separation (Irwin, 2002). Thus, the two mitochondrial  
165 clades that loosely correspond with a lengthy transect from Georgia to the southern tip of Florida  
166 provide only weak evidence of population structure, let alone evidence to suggest a species  
167 boundary.

168           Krysko *et al.* (2016b) found that individuals from the contact zone between the two  
169 lineages (e.g., Alachua, Clay, Indian River, and Volusia counties) are morphologically  
170 intermediate between what they considered core populations of the two mitochondrial lineages;  
171 the authors hypothesized that such intermediate populations might represent a “hybrid” zone  
172 between lineages, an implicit hypothesis of contemporary gene flow between the two  
173 mitochondrial lineage populations (Krysko *et al.*, 2016b). We also note that some counties  
174 possessing morphologically intermediate snakes were distant from the apparent contact zone  
175 between mitochondrial lineages (e.g., Hardee County), suggesting extensive gene flow. If  
176 contemporary nuclear gene flow is as extensive as this, then such evidence is a serious challenge  
177 to the conclusion that the two lineages represent separate species (Frankham *et al.*, 2012).

178

#### 179 MORPHOLOGICAL ANALYSIS

180           Krysko *et al.* (2016b) conducted two sets of analyses designed to test whether  
181 morphological characteristics distinguish the two genetic lineages. First, they tested whether  
182 specimens from each lineage differed in seven morphological measurements traditionally used to  
183 summarize snake scalation (e.g., Savage, 2002): the mean/median number of ventral, subcaudal,  
184 supralabial, and infralabial scales; modal counts of temporal scales (traditional formula of dorsal



185 + ventral), ocular scales (pre- and postoculars); and dorsal scale row counts (one head length  
186 posterior to head, midbody, and one head length anterior to cloaca). This set of analyses,  
187 essentially, yielded no differences between lineages.

188 As a second set of analyses, Krysko *et al.* (2016b) performed principal components  
189 analyses (PCA) on five linear measurements of head morphology: head length, head height,  
190 length of a temporal scale, length of the 7<sup>th</sup> infralabial, and width of the 7<sup>th</sup> infralabial (but see  
191 below). PCA was first run using specimens with known genetic lineage assignment and then  
192 repeated including additional specimens for which genetic lineage assignment was not known.  
193 We focus on the first analysis. Krysko *et al.* (2016b) standardized each variable by dividing each  
194 measurement by the geometric mean of all measurements of that individual and log-transformed  
195 each variable to normalize their distributions. Head length, head height, and 7<sup>th</sup> infralabial length  
196 loaded positively and 7<sup>th</sup> infralabial width loaded negatively on the first principal component,  
197 which explained 44.7% of variance. This axis separated specimens that were described to be  
198 long- and wide-headed with long and narrow 7<sup>th</sup> infralabials (high PC1 scores; almost  
199 exclusively Atlantic lineage snakes) from specimens that were described to be short and narrow-  
200 headed with short and wide 7<sup>th</sup> infralabials (low PC1 scores; almost exclusively Gulf lineage  
201 snakes). Temporal length loaded heavily and positively on the second principal component,  
202 which explained 25.4% of variance and separated specimens with relatively elongate temporals  
203 (high values on PC2; primarily Atlantic lineage) from specimens with relatively short temporals  
204 (low values on PC2; primarily Gulf lineage). The authors then performed a discriminant function  
205 analysis (DFA) to determine how well the morphological variables assigned specimens to their  
206 correct genetic lineage. Because DFA assigned 96.3% of specimens to their correct genetic  
207 lineage, Krysko *et al.* (2016b) used Wards hierarchical cluster analysis to infer lineages for

208 specimens that were not included in the genetic analysis; no details were provided indicating  
209 how such assignments were made. Finally, Krysko *et al.* (2016b) examined contact between the  
210 5<sup>th</sup> and 7<sup>th</sup> supralabial scales, demonstrating that this condition characterized all members of the  
211 Atlantic and Gulf lineages of *D. couperi (sensu lato)*, but that it also characterized 19% of Texas  
212 Indigo Snakes (*D. melanurus erebennus*).

213         We find serious inconsistencies in the scale characters measured as well as the methods  
214 used to evaluate those characters. Krysko *et al.* (2016b) did not clearly identify the specific  
215 temporal scale they measured. These authors described temporals to be 2+2 and invariant on  
216 each side, but noted that “many specimens had smaller divided scales” (Krysko *et al.*, 2016b, p.  
217 555). The 2+2 formula specifies the presence of a pair of anterior (one dorsal and one ventral)  
218 and a pair of posterior (one dorsal and one ventral) temporals (Fig. 1A). This condition is  
219 illustrated in Krysko *et al.* (2016b) for *Drymarchon melanurus*, but occurs in none of their  
220 figures of *D. couperi (sensu lato)*. Instead, figures for *D. couperi (sensu lato)* show an extra  
221 ventral anterior temporal (3<sub>v</sub>+2 condition; Fig. 1B; likely the source of the phrase quoted above)  
222 or an extra dorsal and ventral anterior temporal (4+2 condition; Fig. 1C). When identifying the  
223 temporal scale they measured, Krysko *et al.* (2016b) highlight the central-most dorsal temporal  
224 of an individual expressing the 4+2 condition, but when summarizing results of their temporal  
225 scale analyses they highlight the dorsal posterior temporal of an Atlantic lineage individual  
226 expressing the 3<sub>v</sub>+2 condition and the dorsal posterior temporal of a Gulf lineage individual  
227 expressing the 4+2 condition. Thus, it is unclear which temporal scale Krysko *et al.* (2016b)  
228 measured for specimens with only two dorsal temporals, and how measures of the central dorsal  
229 temporal allowed interpretation of unmeasured posterior temporals.

230 Examination of the infralabial character of Krysko *et al.* (2016b) reveals similar  
231 problems. They state that the 7<sup>th</sup> infralabial was used in their morphological analyses, but they  
232 highlight the 6<sup>th</sup> infralabial in the figures identifying the scale in question. This incongruity is  
233 evident because the 4<sup>th</sup> and 5<sup>th</sup> infralabials are noticeably enlarged in all Eastern Indigo snakes  
234 that we have examined (see results below), a feature consistent with all figures in Krysko *et al.*  
235 (2016b), and the highlighted scale is adjacent to the 5<sup>th</sup> infralabial. Thus, it is unclear which scale  
236 was measured for this important character and whether the same scale was measured among all  
237 individuals included in analysis. It is important to note that the mental scale is visible in all  
238 figures of Krysko *et al.* (2016b) and should not be included in identifying the position of  
239 individual infralabials.

240 Finally, we find problems with the DFA analysis used to determine rates of  
241 misclassification and the cluster analysis used to classify snakes for which no molecular data are  
242 available. Discriminant function analysis is a statistical technique used to generate linear  
243 functions of variables that separate previously-identified groups. Krysko *et al.* (2016b) did not  
244 publish these discriminant functions and instead used a clustering algorithm (Ward's hierarchical  
245 analysis) to classify snakes into one of the two lineages. These authors report that the  
246 discriminant model correctly identified 96.3% of specimens used to create the model; yet they  
247 apparently allowed data used to create the model to also be used to test it, a procedure that yields  
248 inflated estimates for fit of specimens to the model (SAS Institute, Inc., 2008). A better approach  
249 would have been a *k*-fold cross validation procedure in which the dataset is divided so that part  
250 of the data is used to generate the statistical model and the remainder is used for validation  
251 (McGarigal *et al.*, 2000). Nevertheless, DFA is an appropriate statistical tool for classifying  
252 specimens using morphological data when molecular data are not available. Unfortunately,

253 Krysco *et al.* (2016b) use Wards hierarchical cluster analysis instead. This agglomerative  
254 technique joins pairs of specimens that are most similar to each other based on measured  
255 variables, and then iteratively adds additional specimens that are progressively less similar to the  
256 initial clusters. However, Krysco *et al.* (2016b) did not report how they used the results of the  
257 clustering analysis to assign individuals to Atlantic and Gulf Lineages, although statistical  
258 approaches are available for testing for group membership and significance (McGarigal *et al.*,  
259 2000). We suspect that a dendrogram was generated, the basal dichotomy was used to define two  
260 morphological groups, and these groups happened to conform to the Atlantic and Gulf lineages.  
261 If so, we find two serious problems with this method. First, cluster analyses are designed to  
262 estimate numbers of groups when group membership is unknown. Because the number of groups  
263 (two) was known, DFA was a more appropriate tool. Second, while a cluster analysis will always  
264 generate a dendrogram that includes all specimens and that dendrogram will have at least two  
265 groups defined by a basal dichotomy, the procedure also provides statistical tests of group  
266 membership from the terminal nodes to the basal node and tests whether two or more groups  
267 differ significantly. Thus, it is possible for some individuals appearing on a dendrogram to  
268 belong to no group (SAS Institute, Inc., 2008). We therefore suspect that some (perhaps many)  
269 lineage assignments made by Krysco *et al.* (2016b) using the clustering method lack statistical  
270 support for membership in their assigned lineages. We think this is especially likely for the  
271 Mississippi specimen, because it is a geographical outlier.

272

273

## MATERIALS AND METHODS

274

### GENE SEQUENCE ANALYSIS

275 To explore the extent to which nuclear sequence data support speciation within Eastern  
276 Indigo Snakes, we accessed the Krysko *et al.* (2016a) sequence data from GenBank (Appendix I)  
277 and used ML methods to infer a nuclear gene tree from the NT3 dataset, following the methods  
278 used by Krysko *et al.* (2016a). This dataset included 23 *D. couperi* (*sensu lato*) samples (N = 13  
279 Atlantic clade, N = 10 Gulf clade) and four outgroup taxa (*Drymarchon melanurus erebennus*,  
280 *Drymarchon melanurus rubidus*, *Coluber flagellum*, *Coluber constrictor*). We fit different  
281 models of nucleotide substitution and ranked them using BIC; this procedure suggested that the  
282 Kimura (1980) model best fit the data. We then estimated a ML phylogeny for NT3 using the  
283 package ‘phangorn’ (Schliep, 2011) in the statistical Program R (R Core Team, 2016). This  
284 method allowed us to test whether a phylogenetic pattern inferred from nuclear DNA alone  
285 differed from a concatenated analysis of mitochondrial and nuclear DNA.

286

287

#### MICROSATELLITE ANALYSIS

288 We extracted and genotyped microsatellite DNA from 428 tissue samples (scale, shed  
289 skins, or muscle from road-killed individuals) throughout peninsular Florida and southern  
290 Georgia. Twenty-five samples were obtained from the collections of the Florida Museum of  
291 Natural History, including 20 samples used in Krysko *et al.* (2016a). The samples from Krysko  
292 *et al.* (2016a) included individuals from central Florida that represented both mitochondrial  
293 clades where they occur in close proximity. The remaining Florida samples (N = 170) were  
294 collected during field studies of *D. couperi* (Bauder & Barnhardt 2014, Bauder *et al.* 2016a) in  
295 and around Highlands County or opportunistically by authorized project partners. The samples  
296 from Georgia (N = 233) were collected by multiple project partners as part of a study of  
297 population fragmentation in the state (S. Spear *et al.*, unpublished data). Our samples include

298 similar representation of both mitochondrial lineages (55% Atlantic and 45% Gulf). We  
299 extracted DNA using the Qiagen DNeasy blood and tissue extraction kit (Qiagen, Inc., Valencia,  
300 CA). We ran 17 microsatellite loci (Shamblin *et al.*, 2011) within three multiplexed panels using  
301 the Qiagen Multiplex PCR kit (see Appendix II for details). Each reaction contained 1X Qiagen  
302 Multiplex PCR Master Mix, 0.2  $\mu$ M multiplexed primer mix (each primer at equal  
303 concentrations), and 1  $\mu$ l of DNA extract in a total volume of 7  $\mu$ l. The PCR protocol was  
304 modified from Shamblin *et al.* (2011) for multiplex PCR and consisted of an initial denaturation  
305 of 95°C for 15 min, 20 touchdown cycles of 94°C for 30 s, 60°C minus 0.5°C per cycle for 90 s  
306 and 72°C for 1 min, followed by 30 cycles of 94°C for 30 s, 50°C for 90 s and 72°C for 1 min,  
307 and a final elongation step of 60°C for 30 min. Multiplexed PCR products were run on a 3130xl  
308 Applied Biosystems Genetic Analyzer at the University of Idaho's Laboratory for Ecological,  
309 Evolutionary, and Conservation Genetics. We scored fragment sizes using Genemapper 3.7  
310 (Applied Biosystems).

311 We tested for the presence of null alleles that would lead to violations of Hardy-  
312 Weinberg equilibrium assumptions. We eliminated any loci that had an estimated null allele  
313 frequency  $> 0.10$  using the software FreeNA (Chapuis & Estoup, 2007). We estimated  
314 population structure and number of genetic clusters using the Bayesian clustering algorithm  
315 Structure 2.3.4 (Pritchard, Stephens & Donnelly, 2000). We used the admixture model with  
316 100,000 iterations following 10,000 burn-in repetitions. We evaluated  $K = 1-10$  with five  
317 replicates for each value of  $K$ . We used Structure Harvester (Earl & vonHoldt 2012) to  
318 implement the Delta  $K$  method of Evanno *et al.* (2005) to estimate the number of clusters that  
319 best explain the microsatellite data. We used CLUMPP v.1.1.2. (Jakobsson & Rosenberg, 2007)  
320 to estimate the optimal cluster assignment in a single file based on the five replicates for the best

321 supported values of K. Because the Evanno *et al.* (2005) method analyzes changes in likelihood  
322 between values of K, it cannot estimate Delta K for K = 1; therefore, we assessed the probability  
323 of a K = 1 scenario with the raw likelihood values from Structure. Given biases of methods to  
324 estimate population structure from microsatellite data (Janes *et al.*, 2017), we sought to follow  
325 recommendations from Janes *et al.* (2017) by describing and comparing population structure  
326 predicted by both the Delta K and raw likelihood outputs from Structure, while also reporting bar  
327 plot outputs for different values of K supported by those methods. We used the program  
328 CLUMPAK (Kopelman *et al.*, 2015) to visualize bar plot outputs from Structure. We note that  
329 during these exploratory hierarchical analyses we observed additional fine scale genetic structure  
330 among populations; these details were outside the scope of the current analysis, but we intend to  
331 examine these data more fully in a future paper.

332 In addition to the clustering analyses, we used Mantel tests to test for isolation by  
333 distance both across and within the two mitochondrial clades. We had exact coordinates for all  
334 samples collected by co-authors. In the case of museum samples, points were only precise to  
335 approximately 10 kilometers. However, considering that our study extent ranged approximately  
336 800 kilometers from north to south, we do not consider this lack of precision as a major source of  
337 error for our isolation-by-distance analysis. We estimated genetic distance at the individual level  
338 using proportion of shared alleles (Bowcock *et al.*, 1994). We estimated proportion of shared  
339 alleles using package ‘memgene’ (Peres-Neto & Galpern, 2014) and implemented Mantel tests  
340 using package ‘vegan’ (Oksanen *et al.*, 2016) in the statistical Program R (R Core Team, 2016).

341

342

#### MORPHOLOGICAL ANALYSIS

343 We examined 114 *D. couperi* (*sensu lato*) housed at the Orienne Center for Indigo  
344 Conservation (OCIC), a sample that included 68 and 17 specimens from the Atlantic and Gulf  
345 lineages of Krysko *et al.* (2016a), respectively, along with 4 specimens of unknown lineage  
346 assignment, 12 specimens derived from F1 hybrids of Atlantic and Gulf lineage snakes, and 13  
347 hybrids of Atlantic lineage snakes crossed with adults of unknown origin. Lateral or dorsolateral  
348 photos of the head were taken of each specimen, including a millimeter ruler for scale. The  
349 photos were used to record the condition of the temporal scales for each specimen. Four  
350 categories were recognized based on the number and position of temporal scales (Fig. 1). We  
351 generated a contingency table providing counts of specimens in each of the four categories for  
352 each lineage, specimens of unknown lineage, and hybrids. Fisher's exact test was used to  
353 determine whether the relative proportions of temporal scale categories differed between the  
354 Atlantic and Gulf lineages. Additionally, we measured total head length (posterior-most point of  
355 8<sup>th</sup> supralabial to anterior tip of rostral; N = 111), head height (only for photos in lateral aspect; at  
356 level of anterior-most point of parietal suture; N = 35), and length of the dorsal posterior  
357 temporal (intersection of ventral posterior temporal, dorsal posterior temporal, and adjacent first  
358 dorsal scale to intersection of ventral posterior temporal, dorsal posterior temporal, and adjacent  
359 ventral temporal; N = 111). All distances were measured using Adobe Photoshop 6.0 with  
360 reference to the photographed ruler. We used an analysis of covariance (ANCOVA) to test  
361 whether the linear relationship between head length and head height differed between Atlantic  
362 and Gulf lineages. We divided the length of the dorsal posterior temporal by head length to  
363 control for effects of body size and used an analysis of variance to test whether temporal length  
364 differed among the four categories of temporal scales.



365 We also examined 11 preserved specimens in the Auburn University Museum (AUM)  
366 collections. These snakes were from southeastern Georgia and presumed to belong to the  
367 Atlantic lineage. For these specimens, we measured length and width of the 6<sup>th</sup> and 7<sup>th</sup> infralabial  
368 scales with dial calipers. We measured both scales because it was not clear which of these was  
369 measured by Krysko *et al.* (2016b) and because they represent the position of the 7<sup>th</sup> lower labial  
370 scale if the mental scale was included and if it was excluded. Additionally, we used photos of the  
371 type specimens presented in Krysko *et al.* (2016) to determine length and width of the 6<sup>th</sup> and 7<sup>th</sup>  
372 infralabial scales using Adobe Photoshop 6.0. A length-to-width ratio was then calculated for  
373 each specimen. Mean differences between 6<sup>th</sup> and 7<sup>th</sup> infralabials were tested as a paired t-test.  
374 Differences between our sample of Atlantic lineage snakes and the type specimens was  
375 determined by visual inspection. We used SAS v.9.4 for all analyses (SAS Institute, Inc., 2008)  
376 with  $\alpha = 0.05$ .

377

## 378 RESULTS

379

### GENE SEQUENCE ANALYSIS

380 We found that the nuclear locus NT3 was completely invariant across all *D. couperi*  
381 specimens, and thus NT3 had no variable sites for phylogenetic inference of *D. couperi*. As  
382 expected, the inferred ML phylogeny estimated a polytomy (Fig. 2), indicating a lack of  
383 phylogenetic structure among individuals from the two mitochondrial lineages of *D. couperi*  
384 (*sensu lato*) (Krysko *et al.*, 2016a). Specimens of *D. melanurus erebennus* and *D. melanurus*  
385 *rubidus* clustered as sister taxa to the exclusion of all *D. couperi* specimens when rooted by  
386 samples from *Coluber*.

387

388

#### MICROSATELLITE ANALYSIS

389           We found evidence for null alleles in three loci (Dry33, Dry63, and Dry69). Therefore,  
390 we eliminated these loci from further analysis and retained the remaining 14 loci. Delta K was  
391 maximized at  $K = 2$  (Fig. 3) and supported two genetic clusters: one associated with the  
392 northern-most samples, and a second with the southern-most samples. However, there was  
393 extensive admixture between the two clusters, particularly in central Florida (Fig. 4; Fig. 5). For  
394 the 20 samples from Krysko *et al.*, (2016a), including representatives from Atlantic and Gulf  
395 lineages, we found all individuals were assigned to our southern cluster, and all were highly  
396 admixed with the northern cluster (0.66 assignment to the southern cluster for the Gulf clade and  
397 0.57 assignment to southern cluster for the Atlantic clade). Raw likelihood values from Structure  
398 began to plateau at  $K = 3$  (Fig. 3) and therefore supported three populations: a cluster of the  
399 southern samples, but described further population subdivision of the northern samples into two  
400 clusters.

401           Genetic distance was strongly correlated with geographic distance across the entire range  
402 of samples (Mantel  $r = 0.39$ ;  $P < 0.001$ ). When our samples were grouped into the Gulf and  
403 Atlantic lineages of Krysko *et al.* (2016a), similar effects of isolation by distance were evident  
404 within each lineage (Mantel's  $r = 0.39$ ,  $p < 0.001$  for the Gulf lineage; Mantel's  $r = 0.40$ ,  $p <$   
405  $0.001$  for the Atlantic lineage), suggesting no strong barriers to gene flow across the range of *D.*  
406 *couperi* (*sensu lato*).

407

408

#### MORPHOLOGICAL ANALYSIS

409           Our sample of OCIC specimens recovered four categories of temporal scales from both  
410 Atlantic and Gulf lineages (Table 1). In 22% of specimens, temporals conformed to the 2+2

411 formula that Krysko *et al.* (2016b) described as being invariant (Fig. 1A). We found that 38% of  
412 specimens exhibited an extra ventral temporal (Fig. 1B), 26% of specimens had extra dorsal and  
413 ventral temporals (Fig. 1C), and 14% of specimens exhibited an extra dorsal temporal (Fig. 1D).  
414 The frequency with which these four categories occurred differed between Atlantic and Gulf  
415 lineage specimens (Table 1;  $df = 3$ ; Fisher's Exact  $P = 0.006$ ), with Atlantic lineage snakes  
416 tending to have two dorsal temporals and Gulf lineage snakes tending to have three dorsal  
417 temporals. Head shape, based on ANCOVA of head width on head length, did not differ between  
418 Atlantic and Gulf lineages in either slope (Fig. 7;  $F = 0.07$ ;  $df = 1$ ;  $P = 0.79$ ) or intercept ( $F =$   
419  $0.48$ ;  $df = 1$ ;  $P = 0.49$ ). Length of the dorsal posterior temporal, expressed as a proportion of  
420 head length, differed significantly among temporal categories ( $F = 18.34$ ;  $df = 3$ ;  $P < .0001$ ),  
421 with the dorsal posterior temporal being proportionately shorter when three dorsal temporal  
422 scales are present relative to when two dorsal temporal scales are present (Fig. 6).

423         When the length and width of the 6<sup>th</sup> and 7<sup>th</sup> infralabial scales were converted to a length-  
424 to-width ratio, the distribution of our sample of scales from Atlantic lineage snakes encompassed  
425 values for both type specimens for each scale (Fig. 8). Length-to-width ratios differed between  
426 6<sup>th</sup> and 7<sup>th</sup> infralabials ( $t = 8.07$ ;  $df = 12$ ,  $P < .0001$ ), with 7<sup>th</sup> infralabials being more elongate  
427 than 6<sup>th</sup> infralabials.

428

429

## DISCUSSION

430

### GENE SEQUENCE ANALYSIS

431         We found no variation of the nuclear NT3 locus in sequences generated by Krysko *et al.*  
432 (2016a). These authors included this locus because it “potentially represents an informative,  
433 single-copy, unlinked locus that is likely evolving at a different rate than mtDNA

434 (mitochondrial) genes”. From this we infer that the authors expected this nuclear gene to  
435 corroborate patterns generated from mtDNA, solidifying their conclusion that two species are  
436 present. However, if the locus was expected to be informative (i.e., *sensu* Ruane *et al.*, 2014),  
437 then the fact that it is invariant indicates that it (1) does not support population structure  
438 consistent with two genetic populations (i.e., two species), (2) was not necessary to include it in  
439 the study, and (3) only served to restrict phylogenetic inference to the mitochondrial genome and  
440 its inherent problems. From a statistical perspective, the only effect of including NT3 in their  
441 analysis was a slight reduction of branch lengths due to the sequence’s invariance. For these  
442 reasons, we suggest that the gene sequence data do not provide compelling evidence in support  
443 of two distinct species of *D. couperi* (*sensu lato*).

444

#### 445 MICROSATELLITE ANALYSIS

446 Our population genetic analyses supported two populations within Eastern Indigo Snakes,  
447 as did that of Krysko *et al.* (2016a). However, there are two key differences between the  
448 population structure described by our microsatellite analysis and their phylogenetic results. First,  
449 the geographic pattern of our population clusters suggests a north-south orientation rather than a  
450 Gulf-Atlantic orientation. Second, and most importantly, our analyses document widespread  
451 contemporary admixture of alleles from the northern and southern populations. Admixture  
452 occurs across the entire range of *D. couperi* (*sensu lato*), and cannot be characterized as a narrow  
453 hybrid zone. Instead, genetic structure among populations is best described as continuous  
454 isolation by distance rather than discrete evolutionary lineages. Meirmans (2012) demonstrated  
455 through simulations that it is possible to have a significant isolation by distance pattern even  
456 with two discrete clusters. However, if this was the scenario in our study, we would expect to see

457 a much stronger isolation by distance relationship within lineages relative to across the two  
458 lineages recognized by Krysko *et al.* (2016a,b). In fact, the correlation of genetic and geographic  
459 distance is nearly identical within and between clusters, which is strong evidence that there are  
460 not two separate evolutionary groups of Eastern Indigo Snakes. Based on examination of  
461 microsatellites and issues we noted about their migration analysis, we contest the conclusion that  
462 the two lineages of Krysko *et al.* (2016a) have “near discrete geographic distributions” (p. 118)  
463 and that “dispersal between lineages is too low to influence demographic processes” (p. 119).  
464 Rather, these results describe two parapatric populations with high levels of contemporary gene  
465 flow, observations that are highly inconsistent with a two-species hypothesis and more in support  
466 of a single evolutionary metapopulation lineage species of *D. couperi* (Frankham *et al.*, 2012).

467 Our analyses add to a growing number of examples of Florida organisms that appear,  
468 based on modeling of one or few genetic loci, to represent species that are distinct from other  
469 mainland counterparts, but for which microsatellite or similar data demonstrate substantial gene  
470 flow. Burbrink and Guiher (2014) estimated that there was such low gene flow between Florida  
471 Cottonmouths and mainland cottonmouths that speciation must have occurred between the two, a  
472 hypothesis immediately contested by data from Strickland *et al.* (2014) who detected a broad  
473 geographic range of admixture using AFLP markers. Similarly, Thomas *et al.* (2014) described  
474 alligator snapping turtles from the Apalachicola River and adjacent rivers to be a distinct species,  
475 despite microsatellite data from Echelle *et al.* (2010) that are inconsistent with this conclusion  
476 (Folt & Guyer, 2015). Likewise, Gordon *et al.* (2017) used mtDNA to describe a population of  
477 *Anaxyrus boreas* in the western United States as a distinct species, a conclusion contested by  
478 microsatellite analysis of gene flow (Forrest *et al.*, 2017).

479

480

## MORPHOLOGICAL ANALYSIS

481           Contrary to the results presented in Krysko *et al.* (2016b), we reject the hypothesis that  
482 the Atlantic and Gulf lineages are identifiable entities revealed by morphology. We reach this  
483 conclusion after re-examining the variables used by Krysko *et al.* (2016b) to diagnose each  
484 lineage. Of the disparities that emerge between our analyses and theirs, the conformation of the  
485 infralabials is the most problematic. The figures presented by Krysko *et al.* (2016b) for the 6<sup>th</sup>  
486 infralabial show great promise for diagnosing lineages, and separation of the lineages along PC1  
487 of their analysis seems to provide statistical support for this character. However, we were struck  
488 by how dissimilar Atlantic specimens appeared to be from the scale shape ascribed to them by  
489 Krysko *et al.* (2016b). Our analyses demonstrate that the 6<sup>th</sup> and 7<sup>th</sup> infralabials differ in shape,  
490 that the shape of the 7<sup>th</sup> infralabial conforms to the shape ascribed to the Atlantic lineage, and  
491 that the shape of the 6<sup>th</sup> infralabial conforms to that ascribed to the Gulf lineage. It is unclear  
492 which of these scales was measured by Krysko *et al.* (2016b) and we found that the range of  
493 variation of each scale within a sample of Atlantic lineage snakes encompasses both type  
494 specimens. One potential explanation for this discrepancy is that Krysko *et al.* (2016b) intended  
495 to measure the 7<sup>th</sup> infralabial but inadvertently measured the 6<sup>th</sup> for Gulf lineage specimens and  
496 the 7<sup>th</sup> for Atlantic lineage specimens, perhaps because the mental scale sometimes was included  
497 in counts and other times was not. Otherwise, we are left with a PCA that separates lineages  
498 based on one of the two possible scales, but a univariate analysis that fails to confirm these  
499 lineages.

500           Our results for the temporal scale reveal great variation in the number of these scales  
501 present in Eastern Indigo Snakes. The four categories that characterize this variation are found in  
502 both Atlantic and Gulf lineage snakes, indicating that this feature is not diagnostic. Nevertheless,

503 Atlantic lineage snakes tend to have two dorsal temporals, while Gulf lineage snakes tend to  
504 have three. We assume that Krysko *et al.* (2016b) intended to measure the dorsal posterior  
505 temporal and, therefore, we focused our attention on this scale. Our data indicate that the length  
506 of the dorsal posterior temporal, relative to head length, becomes shortened if three dorsal  
507 temporals are present and becomes elongate if two dorsal temporals are present. This finding  
508 indicates that the scale shapes revealed by PC2 of Krysko *et al.* (2016b) represent distinguishable  
509 groups, but these represent two phenotypes and not two species. We infer that the different  
510 morphologies of the dorsal posterior temporal result because, during embryonic development of  
511 some individuals, the dorsal anterior temporal divides, limiting space for development of the  
512 dorsal posterior temporal.

513           Krysko *et al.* (2016b) also used head shape to diagnose the two lineages. Relative head  
514 length and head height did load heavily on their PC1 axis and they used this to diagnose the  
515 Atlantic lineage as having an elongate wide head and to diagnose the Gulf lineage as having a  
516 short narrow head. Our bivariate examination of head length and height revealed no difference in  
517 head shape between the two lineages. We have no convenient explanation for why our results  
518 differed from Krysko *et al.* (2016b), although we note that snake morphology can be difficult to  
519 measure consistently (Madsen & Shine, 2001). Specimens preserved with mouths open are likely  
520 to have larger values for head height than those with mouths closed. If the relative frequency of  
521 open-mouthed versus closed-mouthed specimens differed between lineages, this might yield a  
522 spurious association of head shape with lineage. Our measurements were made from live  
523 specimens with closed mouths, which we infer reduces measurement error. If the lineages truly  
524 differ in head shape, our ANCOVA should have revealed this difference.

525

526 NATURAL HISTORY MECHANISMS

527 Our examination of genetic and morphological variation in *D. couperi* (*sensu lato*)  
528 demonstrates that the two-species hypothesis proposed by Krysko *et al.* (2016b) is not supported  
529 by available data. We offer several explanations for why true patterns of gene flow might result  
530 in a lack of genetic and morphological differentiation. First, movements of *D. couperi* can be  
531 extensive, especially for males. Male annual home range size is as large as ca. 1500 ha (Hyslop  
532 *et al.*, 2014) and average ca. 2.5–6.6 times larger than for females (Breininger *et al.*, 2011;  
533 Hyslop *et al.*, 2014). In fact, the disparity between male and female home range sizes becomes  
534 exacerbated in large snakes, a feature dominated by data from *D. couperi* (Fig. 9; Appendix III).  
535 Within peninsular Florida, male *D. couperi* can move up to ca. 2 km in a single day and average  
536 movement distance in males is ca. twice that of females (Bauder *et al.*, 2016a; D. Breininger,  
537 unpublished data). Furthermore, males within peninsular Florida increase their movement  
538 frequency, distance, and home range size during the breeding season (Bauder *et al.*, 2016a, b).  
539 Dispersal distance of males may be 10 times that of females (Stiles, 2013), with a small adult  
540 male in southern Georgia dispersing at least 22.2 km (straight line) over approximately two years  
541 (Stevenson & Hyslop, 2010).

542 A second feature of *D. couperi* life history that reduces opportunity for speciation is the  
543 variety of habitats used by these animals throughout a year (e.g., Hyslop *et al.*, 2014),  
544 particularly in peninsular Florida, where individuals will even utilize habitats with varying  
545 degrees of anthropogenic disturbance (Bauder *et al.*, in press). This broad habitat use reduces the  
546 opportunity for ecological barriers to gene flow and is consistent with the high rates of gene flow  
547 indicated by our microsatellite analysis. Additional life history observations show that *D. couperi*  
548 (*sensu lato*) can cross fresh and saltwater features 6–264 m wide (O’Bryan, 2017; D. Stevenson,



549 personal observation; D. Breininger, unpublished data), and we note that traditional river barriers  
550 (Soltis *et al.*, 2006) do not appear to limit gene flow in these large snakes. While we do not doubt  
551 that a historical climatic event may have separated *D. couperi* into two populations (Krysko *et*  
552 *al.*, 2016a), the observed levels of contemporary gene flow indicate that genetic populations of  
553 *D. couperi* are in the process of merging back into a single evolutionary population (i.e.,  
554 species), as has been observed for diverse taxa following climatic cycles (Frankham *et al.*, 2011).

555         Together, our knowledge of *D. couperi* movement patterns and life history allows us to  
556 hypothesize that limited female movement drives structure of the maternally-inherited mtDNA  
557 data presented by Krysko *et al.* (2016a), even though high levels of male movement drive  
558 extensive gene flow of the nuclear genome (Thorpe *et al.*, 2008). This life history-based model  
559 of intersexual variance in *D. couperi* gene flow is consistent with two other reptile systems for  
560 which life-history strategies generate contrasting patterns of gene flow among populations. First,  
561 female philopatry of Loggerhead Sea Turtles (*Caretta caretta* Linnaeus 1758) causes structuring  
562 of mtDNA in the Atlantic Ocean, but high male dispersal drives significant nuclear gene flow  
563 among populations (Bowen *et al.*, 2005). Second, a recent study of Neotropical snakes found  
564 active-foraging species to have greater rates of nuclear gene flow than ambush-predator species  
565 with more limited dispersal (de Fraga *et al.*, 2017). Last, and most relevant, many squamates are  
566 polygynous and are characterized by greater male dispersal relative to females (Leturque &  
567 Rousset, 2004; e.g., Keog, Webb & Shine, 2007; Dubey *et al.*, 2008; Calsbeek, 2009); therefore,  
568 squamates typically have greater nuclear gene flow than that of the mitochondrion (Thorpe *et al.*,  
569 2008). This pattern is also seen in many waterfowl species (Scribner *et al.* 2001; Peters *et al.*,  
570 2012). Thus, we suggest that *D. couperi* is similar to other reptile species in that life history  
571 provides explanations for why phylogeographic patterns from mtDNA are inconsistent with

572 historical and/or contemporary patterns of nuclear DNA. Because of this incongruence and the  
573 high levels of recent gene flow among populations observed by our microsatellite analysis, we  
574 place *Drymarchon kolpobasileus* into synonymy with *D. couperi*. For now, we retain all Eastern  
575 Indigo Snakes within *D. couperi*, but note that the analysis of Krysko *et al.* (2016b) reveals that  
576 this species may not be diagnosable from *D. melanurus erebennus* (Cope 1960).

577

578

#### CONSERVATION IMPLICATIONS

579 Eastern Indigo Snakes are now being released into the Conecuh National Forest (CNF) of  
580 south-central Alabama and to the Apalachicola Bluffs and Ravines Reserve in the panhandle of  
581 Florida. Efforts to repatriate the species are the result of extensive collaborations and  
582 partnerships between state and federal agencies, as well as non-governmental conservation  
583 organizations. Initially, snakes used for release were to come from wild-caught gravid females  
584 taken from sites in southeastern Georgia, retained in captivity until they laid eggs, and then  
585 released at the point of capture. Eggs from these initial females then were to be hatched in  
586 captivity and raised for release at one of the two repatriation sites or donated to the Orianne  
587 Center for Indigo Conservation (OCIC), where captive breeding from these and other donated  
588 animals was to occur, eventually replacing use of wild-captured females. Many meetings were  
589 held among stakeholders and, as Krysko *et al.* (2016a) note, their preliminary molecular results  
590 (Krysko, Smith & Smith, 2010) were presented at one of these early meetings as a challenge to  
591 the release of Atlantic lineage snakes at the two release sites. Here we describe why data from  
592 that preliminary report did not compel changes in the repatriation plan and why continuation of  
593 that plan is unlikely to encounter the problems predicted by Krysko *et al.* (2016a).

594           A lack of apparently viable populations of Eastern Indigo Snakes in the Florida  
595 panhandle and southern Alabama and Mississippi was recognized as a significant gap in efforts  
596 to retain Eastern Indigo Snakes across its historic geographic range. This gap guided the choice  
597 of the two sites where repatriation was deemed reasonable (Enge *et al.*, 2013). Data from Krysko  
598 *et al.* (2010) were used to propose that only snakes of the Gulf lineage be used for repatriation  
599 because genetic information from two isolated samples from the panhandle of Florida were of  
600 this lineage. However, because Eastern Indigo Snakes were extirpated at both sites, discussions  
601 centered on how to deal with the uncertainty of which lineage historically occurred at each site  
602 and, therefore, which lineage(s) were appropriate to release at each site. This uncertainty  
603 recognized the fact that, for both sites, the 3<sup>rd</sup> and 4<sup>th</sup> closest localities currently occupied by  
604 Eastern Indigo Snakes have the Atlantic lineage. Additionally, the Atlantic lineage occurs in the  
605 Suwannee drainage, which empties into the Gulf of Mexico, further illustrating the uncertainty in  
606 identifying the location of the Gulf-Atlantic split and that both lineages are found in north  
607 Florida where they might serve as colonists for the release sites. Participants in these discussions  
608 were made aware of then-unpublished microsatellite data demonstrating widespread gene flow  
609 between lineages and observations from the zoo and herpetocultural communities documenting  
610 interbreeding of the two lineages with no apparent effects of outbreeding depression. While there  
611 is currently no evidence of ecological differences between Atlantic and Gulf lineage snakes,  
612 snakes from northern populations are known to differ markedly from southern populations in  
613 seasonal activity. Specifically, *D. couperi* in the latter region do not appear dependent upon  
614 Gopher Tortoise (*Gopherus polyphemus* Daudin 1802) burrows for winter refugia, likely because  
615 of milder winter temperatures (Stevenson, Dyer & Willis-Stevenson, 2003; Hyslop, Cooper &  
616 Meyers, 2009; Hyslop *et al.*, 2014; Breininger *et al.*, 2011; Bauder *et al.*, 2016a). As a result, use

617 of snakes from similar latitudes appeared to be more important in ensuring successful  
618 repatriation than use of snakes from the same mitochondrial lineage. The majority of meeting  
619 participants therefore concluded that the wide movements of male *D. couperi* and broad habitat  
620 use of the species made matching of mitochondrial DNA lineages less important in guiding  
621 repatriation than matching spatial variation in ecology. Preservation of mitochondrial lineages  
622 was already achieved through apparently viable populations at the northern and southern  
623 geographic extremes of *D. couperi* and release of snakes of one mitochondrial lineage into an  
624 area historically occupied by the other lineage was viewed simply as replicating patterns of gene  
625 flow observed throughout much of north and central Florida.

626         Those charged with implementing conservation planning for the Eastern Indigo Snake  
627 welcome the opportunity to base those plans on the best published science. Because inferences  
628 from phylogenetic analyses of few loci can conflict with those from contemporary gene flow, we  
629 suggest that, at a minimum, both tools should be considered to adequately reveal recently  
630 diverged taxa. Additionally, we argue that a more-consistent voice from the community of  
631 systematists will emerge when life-history data are allowed to inform speciation models. For  
632 example, the potential for large snakes to move long distances as well as a difference in  
633 movement behavior between the sexes limit the utility of mitochondrial data alone to reveal  
634 novel species. We suspect this disparity in movement is rampant within squamates (see e.g.  
635 Perry & Garland, 2002). Finally, species descriptions for which diagnoses merely report  
636 measures of variables that overlap widely among taxa (e.g., Thomas *et al.*, 2014; Krysko *et al.*,  
637 2016b) or that are not derived from results presented in the paper (e.g., Burbrink & Guiher,  
638 2014) should be rejected because they fail to provide further evidence that the proposed taxon is  
639 identifiable as an individual. We point to Warwick *et al.* (2015), Sovic *et al.* (2016), and Forrest

640 *et al.* (2017) as examples of how careful melding of phylogenetic and population genetic  
641 analyses can improve the process by which one might determine whether several populations  
642 have diverged sufficiently to be recognized as distinct species. Thus, we urge authors and  
643 reviewers to be particularly critical of species descriptions without careful analysis of  
644 contemporary gene flow, because these papers can incorrectly delimit species, contribute to  
645 erroneous hyperdiversity, and confuse efforts to understand and conserve imperiled biodiversity.

646

647

## ACKNOWLEDGMENTS

648 We thank the Alabama Department of Conservation and Natural Resources, Auburn  
649 University College of Science and Mathematics, Orianna Society, and U.S. Fish and Wildlife  
650 Service for funding that made this study possible. We thank the Orianna Center for Indigo  
651 Conservation for allowing us access to the captive breeding collection of *D. couperi*, and we  
652 thank the Florida Museum of Natural History, M. Aldecoa, P. Barnhart, D. Ceilley, Z. Forsburg,  
653 G. Graziani, C. Lechowicz, J. Macey, S. Mortellaro, L. Paden, D. Parker, K. Ravenscroft, M.  
654 Ravenscroft, B. Rothermel, A. Safer, J. Sage, F. Snow, K. Stohlgren, M. Wallace, Sr., and J.  
655 Wasilewski for providing samples. Use of live snakes was covered under Auburn University  
656 IACUC protocols (PRN 2007-1142, 2010-1750, 2013-2386) and a federal permit TE32397A-O.  
657 This paper is contribution no. [...] of the Auburn University Museum of Natural History.

658

659

## REFERENCES

660 Auffenberg WF. 1963. The fossil snakes of Florida. *Tulane Studies in Zoology* 10: 131–216

- 661 Agapow PM, Bininda-Emonds OR, Crandall KA, Gittleman JL, Mace GM, Marshall JC, Purvis  
662 A. 2004. The impact of species concept on biodiversity studies. *The Quarterly review of*  
663 *biology* 79: 161–179.
- 664 Avise JC. 1989. A role for molecular genetics in the recognition and conservation of endangered  
665 species. *Trends in Ecology and Evolution* 4: 279–281.
- 666 Avise JC, Shapira JF, Daniel SW, Aquadro CF, Lansman RA. 1983. Mitochondrial DNA  
667 differentiation during the speciation process in *Peromyscus*. *Molecular Biology and*  
668 *Evolution* 1: 38–56.
- 669 Ballard JWO, Whitlock MC. 2004. The incomplete natural history of mitochondria. *Molecular*  
670 *Ecology* 13: 729–744.
- 671 Bauder JM, Barnhart P. 2014. Factors affecting the accuracy and precision of triangulated radio  
672 telemetry locations of Eastern Indigo Snakes (*Drymarchon couperi*). *Herpetological*  
673 *Review* 45: 590–597.
- 674 Bauder JM, Breininger DR, Bolt MR, Legare ML, Jenkins CL, Rothermel BB, McGarigal K.  
675 2016a. Seasonal variation in eastern indigo snake (*Drymarchon couperi*) movement  
676 patterns and space use in peninsular Florida at multiple temporal scales. *Herpetologica*  
677 72: 214–226.
- 678 Bauder JM, Breininger DR, Bolt MR, Legare ML, Jenkins CL, Rothermel BB, McGarigal K.  
679 2016. The influence of sex and season on conspecific spatial overlap in a large, actively-  
680 foraging colubrid snake. *PLoS ONE* 11: 1–19.
- 681 Bauder JM, Breininger DR, Bolt MR, Legare ML, Jenkins CL, Rothermel BB, McGarigal K. In  
682 press. Multi-level, multi-scale habitat selection by a wide-ranging ranging federally  
683 threatened snake. *Landscape Ecology*.

- 684 Bowcock JM, Ruiz-Linares A, Tomfohrde J, Minch E, Kidd JR, Cavalli-Sforza LL. 1994. High  
685 resolution of human evolutionary trees with polymorphic microsatellites. *Nature* 368:  
686 455–457.
- 687 Bowen BW, Bass AL, Soares L, Toonen RJ. 2005. Conservation implications of complex  
688 population structure: Lessons from the loggerhead turtle (*Caretta caretta*). *Molecular*  
689 *Ecology* 14: 2389–2402.
- 690 Breininger DR, Legare ML, Smith RB. 2004. Eastern Indigo Snakes (*Drymarchon couperi*) in  
691 Florida. In: Akcakaya H, Burgman M, Kindvall O, Wood C, Sjogren-Gulve P, Hatfield J,  
692 McCarthy M, eds. *Species Conservation and Management: Case Studies*. New York:  
693 Oxford University Press, 299–311.
- 694 Breininger DR, Bolt MR, Legare ML, Drese JH, Stolen ED. 2011. Factors Influencing Home-  
695 Range Sizes of Eastern Indigo Snakes in Central Florida. *Journal of Herpetology* 45:  
696 484–490.
- 697 Burbrink FT, Guiher TJ. 2014. Considering gene flow when using coalescent methods to delimit  
698 lineages of North American pitvipers of the genus *Agkistrodon*. *Zoological Journal of the*  
699 *Linnean Society*.
- 700 Calsbeek R. 2009. Sex-specific adult dispersal and its selective consequences in the brown anole,  
701 *Anolis sagrei*. *Journal of Animal Ecology* 78: 617–624.
- 702 Carstens BC, Pelletier TA, Reid NM, Satler JD. 2013. How to fail at species delimitation.  
703 *Molecular ecology* 22: 4369–83.
- 704 Chapuis MP, Estoup A. 2007. Microsatellite null alleles and estimation of population  
705 differentiation. *Molecular Biology and Evolution* 24: 621–631.

- 706 Clark DR Jr. 1970. Ecological study of the worm snake, *Carphophis vermis* (Kennicott).  
707 *Miscellaneous Publications of the University of Kansas Museum of Natural History* 19:  
708 85–194.
- 709 Daugherty C, Cree A, Hay J, Thompson M. 1990. Neglected taxonomy and continuing  
710 extinctions of tuatara (*Sphenodon*). *Nature* 374: 177–179.
- 711 de Fraga R, Lima AP, Magnusson WE, Ferrao M, Stow AJ. 2017. Contrasting patterns of gene  
712 flow for Amazonian snakes that actively forage and those that wait in ambush. *Journal of*  
713 *Heredity* 108: 524–534.
- 714 Dodd CK, Barichivich JW. 2007. Movements of large snakes (*Drymarchon*, *Masticophis*) in  
715 north-central Florida. *Florida Scientist* 70: 83–94.
- 716 Dubey S, Brown GP, Madsen T, Shine R. 2008. Male-biased dispersal in a tropical Australian  
717 snake (*Stegonotus cucullatus*, Colubridae). *Molecular Ecology* 17: 3506–3514.
- 718 Dupuis JR, Roe AD, Sperling FAH. 2012. Multi-locus species delimitation in closely related  
719 animals and fungi: one marker is not enough. *Molecular Ecology* 21: 4422–4436.
- 720 Durner GM, Gates JE. 1993. Spatial ecology of black rat snakes on Remington Farms,  
721 Maryland. *Journal of Wildlife Management* 57: 812–826.
- 722 Earl DA, vonHoldt BM. 2012. STRUCTURE HARVESTER: a website and program for  
723 visualizing STRUCTURE output and implementing the Evanno method. *Conservation*  
724 *Genetic Resources* 4: 359–361.
- 725 Echelle AA, Hackler JC, Lack JB, Ballard SR, Roman J, Fox SF, Leslie DM, Den Bussche RA.  
726 2010. Conservation genetics of the alligator snapping turtle: cytonuclear evidence of  
727 range-wide bottleneck effects and unusually pronounced geographic structure.  
728 *Conservation Genetics* 11: 1375–1387.



- 729 Enge KM, Stevenson DJ, Elliott MJ, Bauder JM. 2013. The historical and contemporary  
730 distribution of the eastern indigo snake (*Drymarchon couperi*). *Herpetological*  
731 *Conservation and Biology* 8: 288–307.
- 732 Evanno G, Regnaut S, Goudet J. 2005. Detecting the number of clusters of individuals using the  
733 software STRUCTURE: a simulation study. *Molecular Ecology* 14: 2611–2620.
- 734 Fitch HS. 1949. Study of snake populations in central California. *American Midland Naturalist*  
735 41: 513–579.
- 736 Fitch HS. 1958. Home ranges, territories, and seasonal movements of vertebrates of the natural  
737 history reservation. *Miscellaneous Publications of the University of Kansas Museum of*  
738 *Natural History* 11: 63–326.
- 739 Fitch HS. 1960. Autecology of the copperhead. *Miscellaneous Publications of the University of*  
740 *Kansas Museum of Natural History* 13: 85–288.
- 741 Fitch HS. 1963a. Natural history of the black rat snake (*Elaphe o. obsoleta*) in Kansas. *Copeia*  
742 1963: 638–649.
- 743 Fitch HS. 1963b. Natural history of the racer, *Coluber constrictor*. *Miscellaneous Publications of*  
744 *the University of Kansas Museum of Natural History* 15: 351–468.
- 745 Fitch HS. 1965. An ecological study of the garter snake, *Thamnophis sirtalis*. *Miscellaneous*  
746 *Publications of the University of Kansas Museum of Natural History* 15: 493–564.
- 747 Fitzgerald M, Shine R, Lemckert F. 2002. Spatial ecology of arboreal snakes (*Hoplocephalus*  
748 *stephensii*, Elapidae) in an eastern Australian forest. *Austral Ecology* 27: 537–545.
- 749 Folt B, Guyer C. 2015. Evaluating recent taxonomic changes for alligator snapping turtles  
750 (Testudines: Chelydridae). *Zootaxa* 3947: 447–450.

- 751 Folt B, Garrison N, Guyer C, Rodriguez J, Bond JE. 2016. Phylogeography and evolution of the  
752 Red Salamander (*Pseudotriton ruber*). *Molecular Phylogenetics and Evolution* 98: 97–  
753 110.
- 754 Forrest MJ, Stiller J, King TL, Rouse GW. 2017. Between hot rocks and dry places: the status of  
755 the Dixie Valley Toad. *Western North American Naturalist* 77: 162–175.
- 756 Frankham R, Ballou JD, Eldridge MDB, Lacy RC, Ralls K, Dudash MR, Fenster CB. 2011.  
757 Predicting the probability of outbreeding depression. *Conservation Biology* 25: 465–475.
- 758 Frankham R, Ballou JD, Dudash MR, Eldridge MDB, Fenster CB, Lacy RC, Mendelson JR,  
759 Porton IJ, Ralls K, Ryder OA. 2012. Implications of different species concepts for  
760 conserving biodiversity. *Biological Conservation* 153: 25–31.
- 761 Funk DJ. 1999. Molecular systematics of cytochrome oxidase I and 16S from *Neochlamisus* leaf  
762 beetles and the importance of sampling. *Molecular Biology and Evolution* 16: 67–82.
- 763 Funk DJ, Omland KE. 2003. Species-level paraphyly and polyphyly: frequency, causes, and  
764 consequences, with insights from animal mitochondrial DNA. *Annual Review of Ecology,  
765 Evolution, and Systematics* 34: 397–423.
- 766 Gamble T, Berendzen PB, Bradley Shaffer H, Starkey DE, Simons AM. 2008. Species limits and  
767 phylogeography of North American cricket frogs (*Acris*: Hylidae). *Molecular  
768 phylogenetics and evolution* 48: 112–25.
- 769 Gerald GW, Bailey MA, Holmes JN. 2006. Movements and activity range sizes of northern  
770 pinesnakes (*Pituophis melanoleucus melanoleucus*) in middle Tennessee. *Journal of  
771 Herpetology* 40: 503–510.
- 772 Ghiselin M. 1997. *Metaphysics and the origin of species*. SUNY Press, Albany.

- 773 Goddard P. 1980. Limited movement areas and spatial behavior in the smoothsnake *Coronella*  
774 *austriaca* in southern England. In: Coborn J, ed. *Proceedings of the European*  
775 *Herpetological Symposium*. Oxford: Cotswold Wild Life Park Limited, 25–40.
- 776 Gordon MR, Simandle ET, Tracy CR. 2017. A diamond in the rough desert shrublands of the  
777 Great Basin in the Western United States: A new cryptic toad species (Amphibia:  
778 Bufonidae: *Bufo* (*Anaxyrus*)) discovered in Northern Nevada. *Zootaxa* 4290: 123–139.
- 779 Grismer JL, Bauer AM, Grismer LL, Thirakhupt K, Aowphol A, Oaks JR, Wood PL, Onn CK,  
780 Thy N, Cota M, Jackman T. 2014. Multiple origins of parthenogenesis, and a revised  
781 species phylogeny for the Southeast Asian butterfly lizards, *Leiolepis*. *Biological Journal*  
782 *of the Linnean Society* 113: 1080–1093.
- 783 Hudson RR. 1990. Gene genealogies and the coalescent process. *Oxford Surveys in Evolutionary*  
784 *Biology* 7: 1–44.
- 785 Hyslop NL, Cooper RJ, Meyers JM. 2009. Seasonal shifts in shelter and microhabitat use of the  
786 threatened Eastern Indigo Snake (*Drymarchon couperi*) in Georgia. *Copeia* 2009: 458–  
787 464.
- 788 Hyslop NL, Stevenson DJ, Macey JN, Carlile LD, Jenkins CL, Hostetler J a., Oli MK. 2012.  
789 Survival and population growth of a long-lived threatened snake species, *Drymarchon*  
790 *couperi* (Eastern Indigo Snake). *Population Ecology* 54: 145–156.
- 791 Hyslop NL, Meyers JM, Cooper RJ, Stevenson DJ. 2014. Effects of body size and sex of  
792 *Drymarchon couperi* (Eastern Indigo Snake) on habitat use, movements, and home range  
793 size in Georgia. *Journal of Wildlife Management* 78: 101–111.
- 794 Irwin, DE. 2002. Phylogeographic breaks without geographic barriers to gene flow. *Evolution*  
795 56: 2383–2394.

- 796 Janes JK, Miller JM, Dupuis JR, Malenfant RM, Gorrell JC, Cullingham CI, Andrew RL. 2017.  
797 The  $K = 2$  conundrum. *Molecular Ecology* 26: 3594–3602.
- 798 Johnson G. 2000. Spatial ecology of the Eastern Massasauga (*Sistrurus c. catenatus*) in a New  
799 York peatland. *Journal of Herpetology* 34: 186–192.
- 800 Jakobsson M, Rosenberg NA. 2007. CLUMPP: a cluster matching and permutation program for  
801 dealing with label switching and multimodality in analysis of population structure.  
802 *Bioinformatics* 23: 1801–1806.
- 803 Kapfer JM, Pekar CW, Reineke DM, Coggins JR, Hay R. 2010. Modeling the relationship  
804 between habitat preferences and home-range size: a case study on a large mobile colubrid  
805 snake from North America. *Journal of Zoology* 282: 13–20.
- 806 Keogh JS, Webb JK, Shine R. 2007. Spatial genetic analysis and long-term mark-recapture data  
807 demonstrate male-biased dispersal in a snake. *Biology Letters* 3: 33–35.
- 808 Kimura M. 1980. A simple method for estimating evolutionary rate of base substitutions through  
809 comparative studies of nucleotide sequences. *Journal of Molecular Evolution* 16: 111–  
810 120.
- 811 Kopelman NM, Mayzel J, Jakobsson M, Rosenberg NA, Mayrose I. 2015. CLUMPAK: a program  
812 for identifying clustering modes and packaging population structure inferences across  $K$ .  
813 *Molecular Ecology Resources* 15: 1179–1191.
- 814 Krysko KL, Smith DJ, Smith CA. 2010. Historic and current geographic distribution and  
815 preliminary evidence of population genetic structure in the Eastern Indigo Snake  
816 (*Drymarchon couperi*) in the southeastern United States. Final Report, Project Agreement  
817 06011, Florida Fish and Wildlife Conservation Commission, Tallahassee, Florida, USA.

- 818 Krysko KL, Nuñez LP, Lippi CA, Smith DJ, Granatosky MC. 2016a. Pliocene-Pleistocene  
819 lineage diversifications in the Eastern Indigo Snake (*Drymarchon couperi*) in the  
820 Southeastern United States. *Molecular Phylogenetics and Evolution* 98: 111–122.
- 821 Krysko KL, Granatosky MC, Nuñez LP, Smith DJ. 2016b. A cryptic new species of Indigo  
822 Snake (genus *Drymarchon*) from the Florida Platform of the United States. *Zootaxa*  
823 4138: 549–569.
- 824 Layne JN, Steiner TM. 1996. Eastern indigo snake (*Drymarchon corais couperi*): summary of  
825 research conducted on Archbold Biological Station. Report prepared under Order,  
826 43910–43916.
- 827 Leturque H, Rousset F. 2004. Intersexual competition as an explanation for sex-ratio and  
828 dispersal biases in polygynous species. *Evolution* 58: 2398–2408.
- 829 Linehan JM, Smith LL, Steen DA. 2010. Ecology of the eastern kingsnake (*Lampropeltis getula*  
830 *getula*) in a longleaf pine (*Pinus palustris*) forest in Southwestern Georgia.  
831 *Herpetological Conservation and Biology* 5: 94–101.
- 832 Macartney JM, Gregory PT, Larsen KW. 1988. A tabular survey of data on movements and  
833 home ranges of snakes. *Journal of Herpetology* 22: 61–73.
- 834 Mace GM. 2004. The role of taxonomy in species conservation. *Philosophical transactions of*  
835 *the Royal Society of London. Series B, Biological Sciences* 359: 711–9.
- 836 Madsen T, Shine R. 2001. Do snakes shrink? *Oikos* 92: 187–188.
- 837 McGarigal K, Cushman S, Stafford S. 2000. *Multivariate Statistics for Wildlife and Ecology*  
838 *Research*. New York: Springer.
- 839 Meirmans PG. 2012. The trouble with isolation by distance. *Molecular Ecology* 21: 2839–2846.

- 840 Miller GJ, Smith LL, Johnson SA, Franz R. 2012. Home range size and habitat selection in the  
841 Florida Pine Snake (*Pituophis melanoleucus mugitus*). *Copeia* 2012: 706–713.
- 842 Moler PE. 1985. Home range and seasonal activity of the eastern indigo snake, *Drymarchon*  
843 *corais couperi*, in northern Florida. Final Performance Report, Study No. E-1-06, III-A-5,  
844 Florida Game and Fresh Water Fish Commission, Tallahassee, FL.
- 845 Nallau G. 1968. Espace vital et territoire chez *Vipera aspis*. *Ecoéthologie* 1: 55–77.
- 846 O’Bryan CJ. 2017. Documentation of unusual movement behaviour of the indigo snake  
847 *Drymarchon couperi* (Holbrook, 1842) (Squamata: Colubridae), an upland species, in a  
848 pastureland matrix of the USA. *Herpetological Notes* 10: 317–318.
- 849 Oksanen J, Blanchet FG, Kindt R, Legendre P, Minchin PR, O’Hara RB, Simpson GL, Solymos  
850 P, Stevens MHH, Wagner H. 2016. Vegan: Community Ecology Package. R package  
851 version 2.3-3. <https://CRAN.R-project.org/package=vegan>.
- 852 Pauly GB, Piskurek O, Shaffer HB. 2007. Phylogeographic concordance in the southeastern  
853 United States: the flatwoods salamander, *Ambystoma cingulatum*, as a test case.  
854 *Molecular Ecology* 16: 415–29.
- 855 Peres-Neto P, Galpern P. 2014. Memgene: Spatial pattern detection in genetic distance data  
856 using Moran’s Eigenvector Maps. R package version 1.0. [https://CRAN.R-](https://CRAN.R-project.org/package=memgene)  
857 [project.org/package=memgene](https://CRAN.R-project.org/package=memgene).
- 858 Perry G, Garland T. 2002. Lizard home ranges revisited: effects of sex, body size, diet, habitat,  
859 and phylogeny. *Ecology* 83: 1870–1885.
- 860 Peters JL, Bolender KA, Pearce JM. 2012. Behavioural vs. molecular sources of conflict between  
861 nuclear and mitochondrial DNA: the role of male-biased dispersal in a Holarctic sea  
862 duck. *Molecular Ecology* 21: 3562–3575.

- 863 Pritchard, JK, Stephens M, Donnelly P. 2000. Inference of population structure using multilocus  
864 genotype data. *Genetics* 155: 945–959.
- 865 R Core Team. 2016. R: A language and environment for statistical computing. R Foundation for  
866 Statistical Computing, Vienna, Austria. <https://www.R-project.org/>.
- 867 Roth ED. 2005. Spatial ecology of a cottonmouth (*Agkistrodon piscivorus*) population in east  
868 Texas. *Journal of Herpetology* 39: 308–312.
- 869 Roth, TC II, Greene BD. 2006. Movement patterns and home range use of the northern  
870 watersnake (*Nerodia sipedon*). *Copeia* 2006: 544–551.
- 871 Ruane S, Bryson RW, Pyron RA, Burbrink FT. 2014. Coalescent species delimitation in  
872 milksnakes (genus *Lampropeltis*) and impacts on phylogenetic comparative analyses.  
873 *Systematic Biology* 63: 231–250.
- 874 Rubinoff D, Holland B. 2005. Between two extremes: mitochondrial DNA is neither the panacea  
875 nor the nemesis of phylogenetic and taxonomic inference. *Systematic Biology* 54: 952–  
876 961.
- 877 Rudolph DC, Burgdorf SJ. 1997. Timber rattlesnakes and Louisiana pine snakes of the western  
878 Gulf Coastal Plain: hypotheses of decline. *Texas Journal of Science* 49: 111–122.
- 879 SAS Institute Inc. 2008. SAS/STAT® 9.2 User’s Guide. Cary, NC: SAS Institute Inc.
- 880 Savage JM. 2002. *The Amphibians and Reptiles of Costa Rica: A Herpetofauna between Two*  
881 *Continents, Between Two Seas*. University of Chicago Press.
- 882 Schliep KP. 2011. phangorn: phylogenetic analysis in R. *Bioinformatics* 27, 592–593.
- 883 Scribner KT, Petersen MR, Fields RL, Talbot SL, Pearce JM, Chesser RK. 2001. Sex-biased  
884 gene flow in spectacled eiders (Anatidae): Inferences from molecular markers with  
885 contrasting modes of inheritance. *Evolution* 55: 2105–2115.

- 886 Shamblin BM, Alstad TI, Stevenson DJ, Macey JN, Snow FH, Nairn CJ. 2011. Isolation and  
887 characterization of microsatellite markers from the threatened eastern indigo snake  
888 (*Drymarchon couperi*). *Conservation Genetic Resources* 3: 303–306.
- 889 Shine R, Fitzgerald M. 1996. Large snakes in a mosaic rural landscape: the ecology of carpet  
890 pythons *Morelia spilota* (Serpentes: Pythonidae) in coastal eastern Australia. *Biological*  
891 *Conservation* 76: 113–122.
- 892 Soltis DE, Morris AB, McLachlan JS, Manos PS, Soltis PS. 2006. Comparative phylogeography  
893 of unglaciated eastern North America. *Molecular Ecology* 15: 4261–93.
- 894 Soltis PS, Gitzendanner MA. 1999. Molecular systematics and the conservation of rare species.  
895 *Conservation Biology* 13: 471–483.
- 896 Sovic MG, Fries AG, Gibbs HL. 2016. Origin of a cryptic lineage in a threatened reptile through  
897 isolation and historical hybridization. *Heredity* 117: 358–366.
- 898 Stevenson DJ, Dyer KJ, Willis-Stevenson BA. 2003. Survey and monitoring of the Eastern  
899 Indigo Snake in Georgia. *Southeastern Naturalist* 2: 393–408.
- 900 Stevenson DJ, Enge KM, Carlile LD, Dyer KJ, Norton TM, Hyslop NL, Kiltie RA. 2009. An  
901 Eastern Indigo Snake (*Drymarchon couperi*) mark-recapture study in southeastern  
902 Georgia. *Herpetological Conservation and Biology* 4: 30–42.
- 903 Stevenson DJ, Hyslop NL. 2010. Long-distance interpopulation movement: *Drymarchon*  
904 *couperi* (Eastern Indigo Snake). *Herpetological Review* 41: 91–92.
- 905 Stiles JA. 2013. Evaluating the use of enclosures to reintroduce Eastern Indigo snakes.  
906 Unpublished M.S. thesis, Auburn University.
- 907 Strickland JL, Parkinson CL, McCoy JK, Ammerman LK. 2014. Phylogeography of *Agkistrodon*  
908 *piscivorus* with emphasis on the western limit of its range. *Copeia* 2014: 639–649.



- 909 Thomas TM, Granatosky MC, Bourque JR, Krysko KL, Moler PE, Gamble T, Suarez E, Leone  
910 E, Enge KM, Roman J. 2014. Taxonomic assessment of Alligator Snapping Turtles  
911 (Chelydridae: *Macrochelys*), with the description of two new species from the  
912 southeastern United States. *Zootaxa* 3786: 141–165.
- 913 Thorpe RS, Surget-Groba Y, Johannson H. 2008. The relative importance of ecology and  
914 geographic isolation for speciation in anoles. *Philosophical Transactions of the Royal  
915 Society of London. Series B, Biological Sciences* 363: 3071–3081.
- 916 US Fish and Wildlife Service. 1978. Endangered and Threatened Wildlife and Plants. Listing of  
917 the Eastern indigo snake as a threatened species. *Federal Register* 43:4026–4029.
- 918 US Fish and Wildlife Service. 1982. Eastern indigo snake recovery plan. US Fish and Wildlife  
919 Service, Atlanta, GA. 23 pp.
- 920 US Fish and Wildlife Service. 2008. Eastern Indigo Snake (*Drymarchon couperi*): 5-year  
921 Review-Summary and Evaluation. Mississippi Ecological Services Field Office, Jackson,  
922 MS. 30 pp.
- 923 Wakely J. 2008. *Coalescent Theory: An Introduction*. Robers and Company Publishers.
- 924 Warwick AR, Travis J, Lemmon EM. 2015. Geographic variation in the Pine Barrens Treefrog  
925 (*Hyla andersonii*): concordance of genetic, morphometric and acoustic signal data.  
926 *Molecular Ecology* 24: 3281–3298.
- 927 Wasko DK, Sasa M. 2009. Activity patterns of a neotropical ambush predator: spatial ecology of  
928 the fer-de-lance (*Bothrops asper*, Serpentes: Viperidae) in Costa Rica. *Biotropica* 41:  
929 241–249.
- 930 Webb JK, Shine R. 1997. A field study of spatial ecology and movements of a threatened snake  
931 species, *Hoplocephalus bungaroides*. *Biological Conservation* 82: 203–217.

932 Whitaker PB, Shine R. 2003. A radiotelemtric study of movements and shelter-site selection by  
933 free-ranging brownsnakes (*Pseudonaja textilis*, Elapidae). *Herpetological Monographs*  
934 17: 130–144.

935 Table 1. Frequency of occurrence of two and three dorsal temporal scales (DTs) between the  
936 Atlantic and Gulf lineages of Eastern Indigo Snakes.

| <u>Mitochondrial Clade</u> | <u>Scale Condition</u> |                   |                   |     |
|----------------------------|------------------------|-------------------|-------------------|-----|
|                            | 2+2                    | 3 <sub>v</sub> +2 | 3 <sub>d</sub> +2 | 4+2 |
| Atlantic                   | 14                     | 30                | 11                | 13  |
| Gulf                       | 5                      | 1                 | 2                 | 9   |
| Atlantic x Gulf            | 2                      | 5                 | 1                 | 4   |
| Atlantic x Unknown         | 2                      | 6                 | 1                 | 4   |
| Unknown                    | 1                      | 2                 | 1                 | 0   |

937

938 Appendix I. GenBank accession numbers for sequence data from the nuclear gene *neurotrophin-*  
 939 3 (NT3) from Krysko *et al.* (2016a) that were analyzed to generate Fig. 2.

| Accession number | Species                               | Country | State   | County     | Mitochondrial lineage |
|------------------|---------------------------------------|---------|---------|------------|-----------------------|
| KT214324         | <i>Drymarchon couperi</i>             | U.S.A.  | Florida | Charlotte  | Gulf                  |
| KT214325         | <i>Drymarchon couperi</i>             | U.S.A.  | Florida | Okaloosa   | Gulf                  |
| KT214326         | <i>Drymarchon couperi</i>             | U.S.A.  | Florida | Lee        | Gulf                  |
| KT214327         | <i>Drymarchon couperi</i>             | U.S.A.  | Florida | Citrus     | Gulf                  |
| KT214328         | <i>Drymarchon couperi</i>             | U.S.A.  | Florida | Hendry     | Gulf                  |
| KT447213         | <i>Drymarchon couperi</i>             | U.S.A.  | Florida | Monroe     | Gulf                  |
| KT214329         | <i>Drymarchon couperi</i>             | U.S.A.  | Florida | Miami-Dade | Gulf                  |
| KT214330         | <i>Drymarchon couperi</i>             | U.S.A.  | Florida | Miami-Dade | Gulf                  |
| KT214331         | <i>Drymarchon couperi</i>             | U.S.A.  | Florida | Dade       | Gulf                  |
| KT214332         | <i>Drymarchon couperi</i>             | U.S.A.  | Florida | Monroe     | Gulf                  |
| KT214333         | <i>Drymarchon couperi</i>             | U.S.A.  | Georgia | Coffee     | Atlantic              |
| KT214334         | <i>Drymarchon couperi</i>             | U.S.A.  | Georgia | Liberty    | Atlantic              |
| KT214335         | <i>Drymarchon couperi</i>             | U.S.A.  | Georgia | Wayne      | Atlantic              |
| KT214336         | <i>Drymarchon couperi</i>             | U.S.A.  | Georgia | Bryan      | Atlantic              |
| KT214337         | <i>Drymarchon couperi</i>             | U.S.A.  | Georgia | Camden     | Atlantic              |
| KT214338         | <i>Drymarchon couperi</i>             | U.S.A.  | Georgia | Coffee     | Atlantic              |
| KT214339         | <i>Drymarchon couperi</i>             | U.S.A.  | Georgia | Telfair    | Atlantic              |
| KT214340         | <i>Drymarchon couperi</i>             | U.S.A.  | Georgia | Evans      | Atlantic              |
| KT214341         | <i>Drymarchon couperi</i>             | U.S.A.  | Georgia | Irwin      | Atlantic              |
| KT447212         | <i>Drymarchon couperi</i>             | U.S.A.  | Georgia | Wheeler    | Atlantic              |
| KT214342         | <i>Drymarchon couperi</i>             | U.S.A.  | Georgia | Liberty    | Atlantic              |
| KT214343         | <i>Drymarchon couperi</i>             | U.S.A.  | Florida | Brevard    | Atlantic              |
| KT214344         | <i>Drymarchon couperi</i>             | U.S.A.  | Florida | Brevard    | Atlantic              |
| KT447212         | <i>Drymarchon melanurus erebennus</i> | U.S.A.  | Texas   | Hidalgo    | -                     |
| KT447213         | <i>Drymarchon melanurus rubidus</i>   | Mexico  | Sonora  | -          | -                     |
| KT447214         | <i>Coluber flagellum</i>              | U.S.A.  | Florida | Washington | -                     |
| KT447215         | <i>Coluber constrictor</i>            | U.S.A.  | Florida | Highlands  | -                     |

941 Appendix II. Multiplex PCR panels for *Drymarchon couperi* microsatellite loci. The names of  
942 loci are as in Shamblin *et al.* (2011).

---

| Multiplex | Locus        |
|-----------|--------------|
| 1         | Dry24 – 6FAM |
|           | Dry55 – 6FAM |
|           | Dry30 – VIC  |
|           | Dry44 – PET  |
|           | Dry68 - NED  |
| 2         | Dry48 – 6FAM |
|           | Dry63 – 6FAM |
|           | Dry58 – VIC  |
|           | Dry59 – VIC  |
|           | Dry65 – VIC  |
|           | Dry69 - VIC  |
|           | Dry06 – PET  |
|           | Dry33 - NED  |
| 3         | Dry05 – 6FAM |
|           | Dry35 – VIC  |
|           | Dry14 – PET  |
|           | Dry70 – NED  |

---

943

944 Appendix III. Citations for snake studies (N = 28) describing intersexual variance in home range  
 945 size (hectares) for 22 species of snakes used to generate Fig. 9. See Macartney *et al.* (1988) for  
 946 an earlier review of the topic.

| <u>Species</u>                   | <u>Home range size (ha)</u> |               | <u>Citations</u>                |
|----------------------------------|-----------------------------|---------------|---------------------------------|
|                                  | <u>Male</u>                 | <u>Female</u> |                                 |
| <i>Agkistrodon contortrix</i>    | 9.9                         | 3.4           | Fitch (1960)                    |
| <i>Agkistrodon piscivorus</i>    | 1.86                        | 0.31          | Roth (2005)                     |
| <i>Bothrops asper</i>            | 6.3                         | 5.8           | Wasko and Sasa (2009)           |
| <i>Carphophis amoenus</i>        | 0.028                       | 0.004         | Clark (1970)                    |
| <i>Coluber constrictor</i>       | 9.3                         | 3.9           | Fitch (1958)                    |
| <i>C. constrictor</i>            | 3                           | 1.8           | Fitch (1963b)                   |
| <i>Coluber flagellum</i>         | 150                         | 21            | Dodd and Barichivich (2007)     |
| <i>Coronella austriaca</i>       | 0.66                        | 0.45          | Goddard (1980)                  |
| <i>Crotalus horridus</i>         | 143.8                       | 19.9          | Rudolph and Burgdorf (1997)     |
| <i>Crotalus viridis</i>          | 12.1                        | 6.5           | Fitch (1949)                    |
| <i>Drymarchon couperi</i>        | 510                         | 101           | Hyslop <i>et al.</i> (2014)     |
| <i>D. couperi</i>                | 202                         | 76            | Breining <i>et al.</i> (2011)   |
| <i>D. couperi</i>                | 141                         | 22            | Moler (1985)                    |
| <i>D. couperi</i>                | 74                          | 19            | Layne and Steiner (1996)        |
| <i>D. couperi</i>                | 149                         | 49            | Bauder <i>et al.</i> (2016a)    |
| <i>Hoplocephalus bungaroides</i> | 2.2                         | 2.1           | Webb and Shine (1997)           |
| <i>Hoplocephalus stephensii</i>  | 20.2                        | 5.4           | Fitzgerald <i>et al.</i> (2002) |
| <i>Lampropeltis getula</i>       | 49.5                        | 49.4          | Linehan <i>et al.</i> (2010)    |
| <i>Morelia spilota</i>           | 12                          | 12            | Shine and Fitzgerald (1996)     |
| <i>Nerodia sipedon</i>           | 0.51                        | 0.58          | Roth and Greene (2006)          |
| <i>Pantherophis obsoletus</i>    | 11.7                        | 9.3           | Fitch (1963a)                   |
| <i>P. obsoletus</i>              | 9.5                         | 9.5           | Durner and Gates (1993)         |
| <i>Pituophis catenifer</i>       | 36.6                        | 26.9          | Kapfer <i>et al.</i> (2010)     |
| <i>Pituophis melanoleucus</i>    | 69                          | 43            | Gerald <i>et al.</i> (2006)     |
| <i>P. melanoleucus</i>           | 70.1                        | 37.5          | Miller <i>et al.</i> (2012)     |
| <i>Pseudonaja textilis</i>       | 11.8                        | 1.5           | Whitaker and Shine (2003)       |
| <i>Sistrurus catenatus</i>       | 27.8                        | 21.7          | Johnson (2000)                  |
| <i>Thamnophis sirtalis</i>       | 14.2                        | 9.2           | Fitch (1965)                    |
| <i>Vipera aspera</i>             | 0.29                        | 0.18          | Naulleau (1968)                 |

948 **Fig. 1.** Head scale patterns in Eastern Indigo Snakes (*Drymarchon couperi*). A) 2+2 condition of  
949 temporals (I = dorsal anterior temporal; II = ventral anterior temporal; III = dorsal posterior  
950 temporal; IV = ventral posterior temporal) and position of 4<sup>th</sup>, 5<sup>th</sup>, 6<sup>th</sup>, and 7<sup>th</sup> infralabials; B)  
951 3<sub>v</sub>+2 condition of temporals (extra ventral temporal shaded); C) 4+2 condition of temporals  
952 (extra dorsal and ventral temporals shaded); D) 3<sub>d</sub>+2 condition of temporals (extra dorsal  
953 temporal shaded).

954 **Fig. 2.** Maximum likelihood phylogeny among samples of Eastern Indigo Snakes (*Drymarchon*  
955 *couperi*, *sensu lato*) and outgroups (*Drymarchon melanurus*, *Coluber constrictor*, *Coluber*  
956 *flagellum*), as inferred from sequence data from the nuclear gene neurotrophin-3 (NT3). Indigo  
957 snakes are labeled by GenBank accession numbers and are classified by the lineages identified  
958 by Krysko *et al.* (2016a; blue = Atlantic lineage; orange = Gulf lineage).

959 **Fig. 3.** Plot of Delta K (A) and likelihood scores (B) used to identify the most likely number of  
960 population clusters across the range of *Drymarchon couperi* using the Bayesian algorithm  
961 Structure (Evanno, Regnaut & Goudet, 2005). The dashed line in (A) indicates Delta K = 0; the  
962 error bars in (B) indicate S.D.

963 **Fig. 4.** Bar plots of population clustering estimated through the Bayesian clustering algorithm  
964 Structure with (A) K = 2 and (B) K = 3. The y-axis is the proportion of individual ancestry for  
965 each cluster; in the x-axis, group 1 represents individuals assigned or assumed to be within the  
966 Atlantic mitochondrial clade, and group 2 represents individuals assigned or assumed to be in the  
967 Gulf mitochondrial clade. Within each group, individuals are sorted by latitude. (A) K = 2; red  
968 indicates alleles from the northern population cluster, and green indicates alleles from the  
969 southern population cluster. (B) K = 3; green and blue indicate alleles from two northern  
970 population clusters, and red indicates alleles from the southern population cluster.

971 **Fig. 5.** Maps of sampling sites represented as pie charts of percent ancestry within population  
972 clusters identified by Structure analyses. (A)  $K = 2$  populations, with the southern cluster  
973 represented as black and the northern cluster as gray; (B)  $K = 3$  populations, with the southern  
974 cluster as black and two northern populations as grey and white. Lines indicate state boundaries  
975 in the southeastern U.S.A.

976 **Fig. 6.** Bivariate plot of head height on head length. Values from Atlantic lineage indicated by  
977 solid circles and solid line; values from Gulf lineage indicated by open circles and dashed line.

978 **Fig. 7.** Box and whiskers plot of distribution of ratio of dorsal posterior temporal scale length to  
979 head length in four categories of temporal scales (see Fig. 1). Vertical lines indicate range; box  
980 indicates interquartile, horizontal line indicates median; open diamond indicates mean.

981 **Fig. 8.** Distribution of length-to-width ratio of 6<sup>th</sup> and 7<sup>th</sup> infralabials in 11 Atlantic lineage  
982 specimens of *Drymarchon couperi* (dark spots). Open triangles indicate ratios from type  
983 specimen of *D. couperi* (Atlantic lineage); open diamonds indicate ratios from type specimen of  
984 *D. kolpobasileus* (Gulf lineage).

985 **Fig. 9.** Bivariate plot of female home range area (ha) on male home range area for 25 studies of  
986 21 species of snakes (Appendix III). Open circles are data from *Drymarchon couperi*; closed  
987 circles are data from all other species of snakes. Dashed line is null expectation if male and  
988 female home range sizes are equal in size.



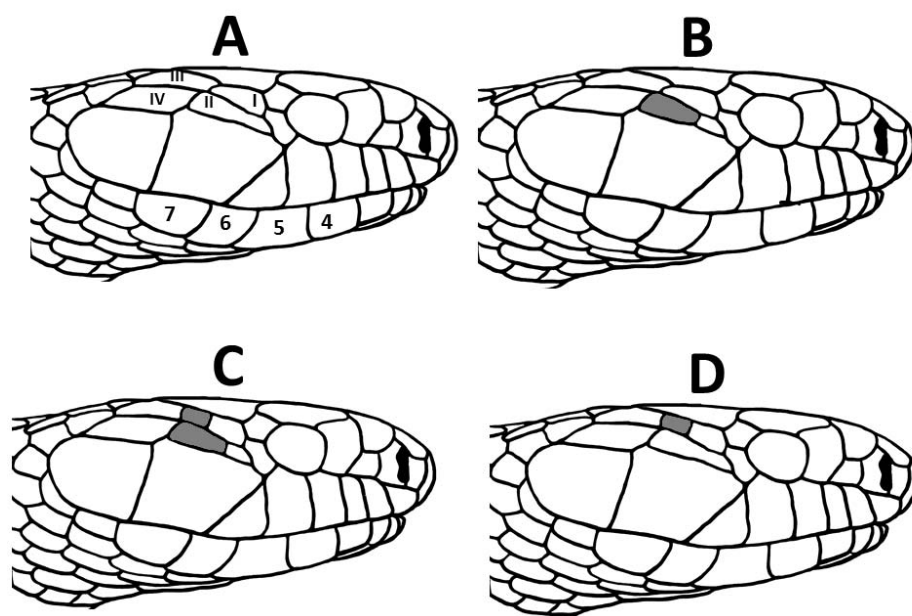

Fig. 1

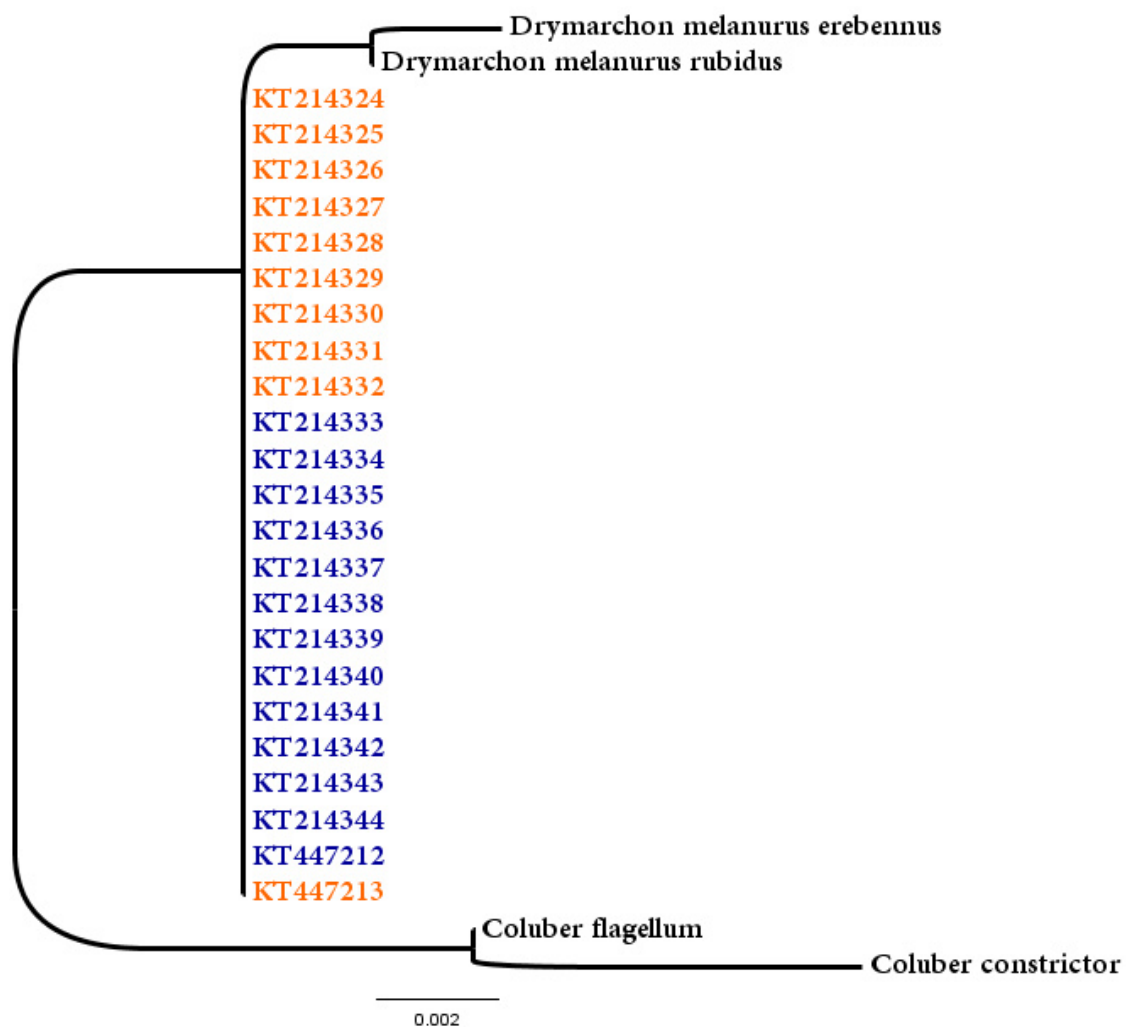

Fig. 2

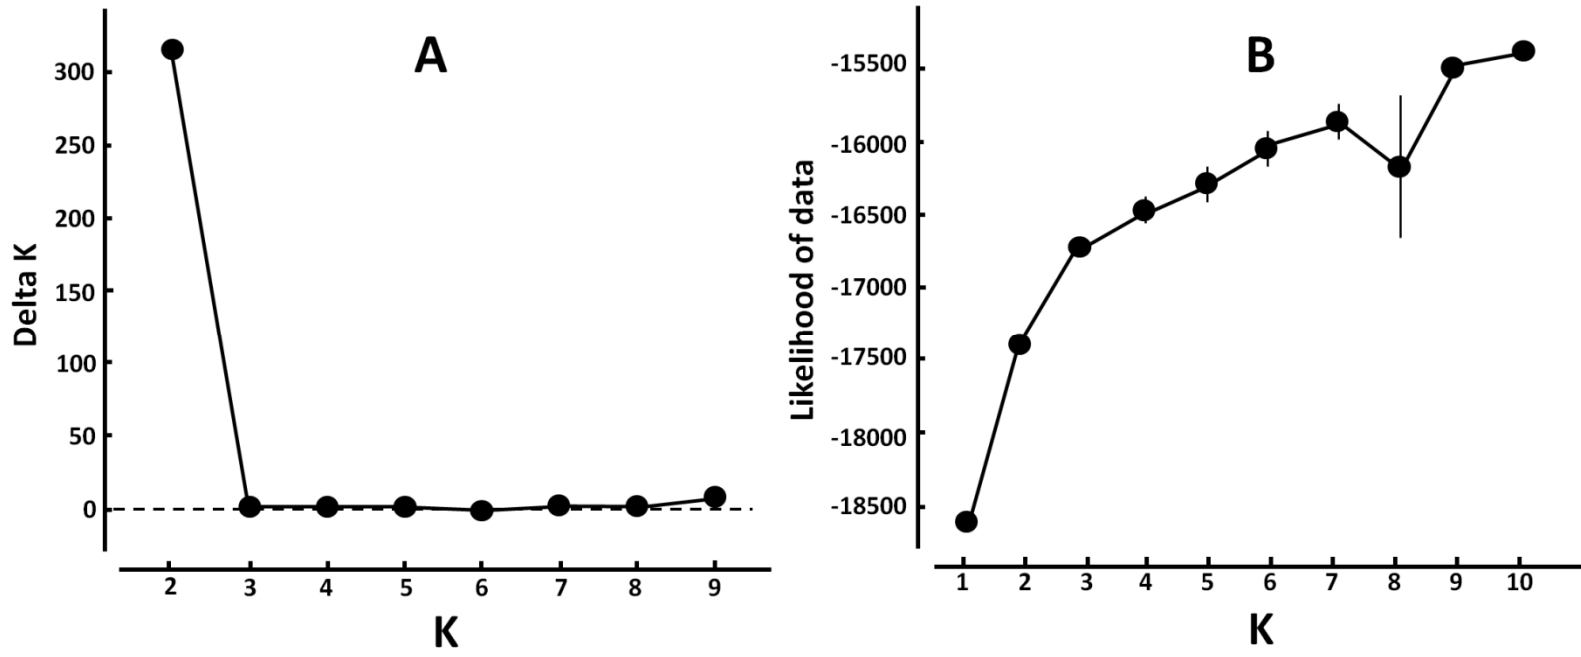

Fig. 3

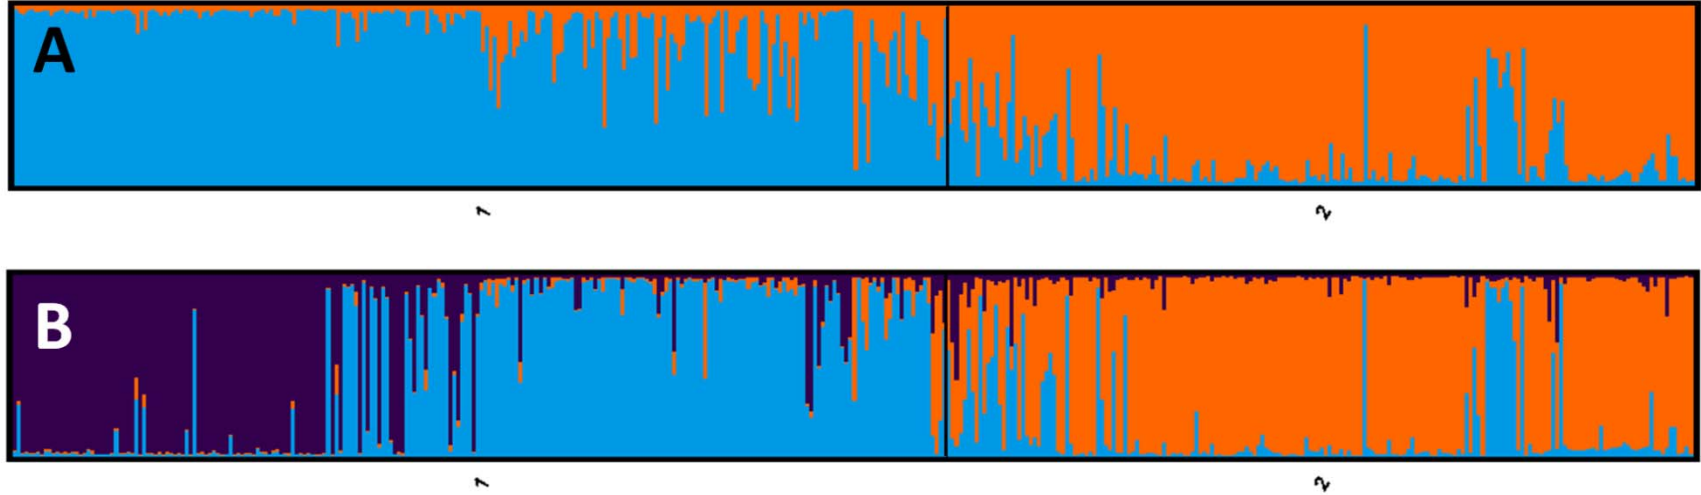

Fig. 4

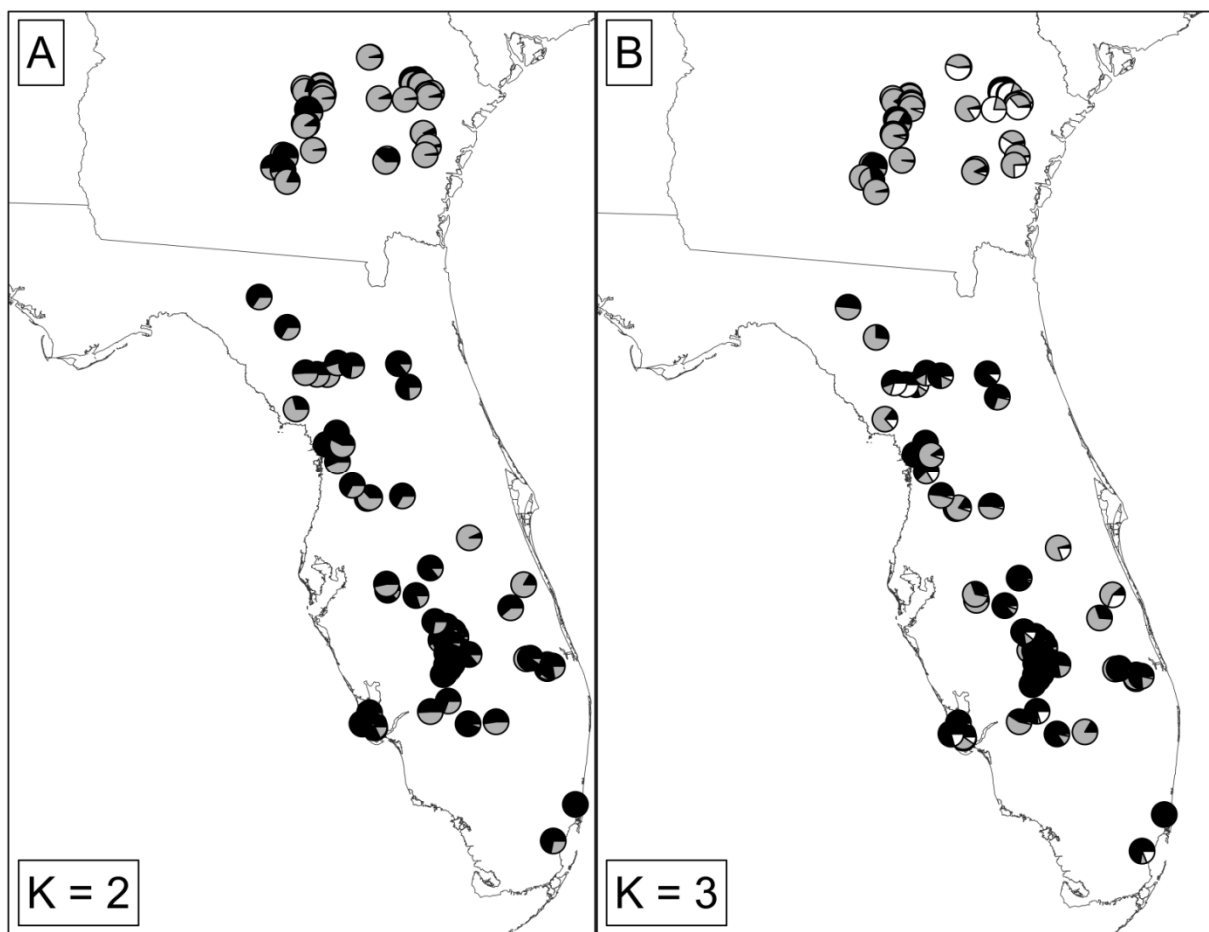

Fig. 5

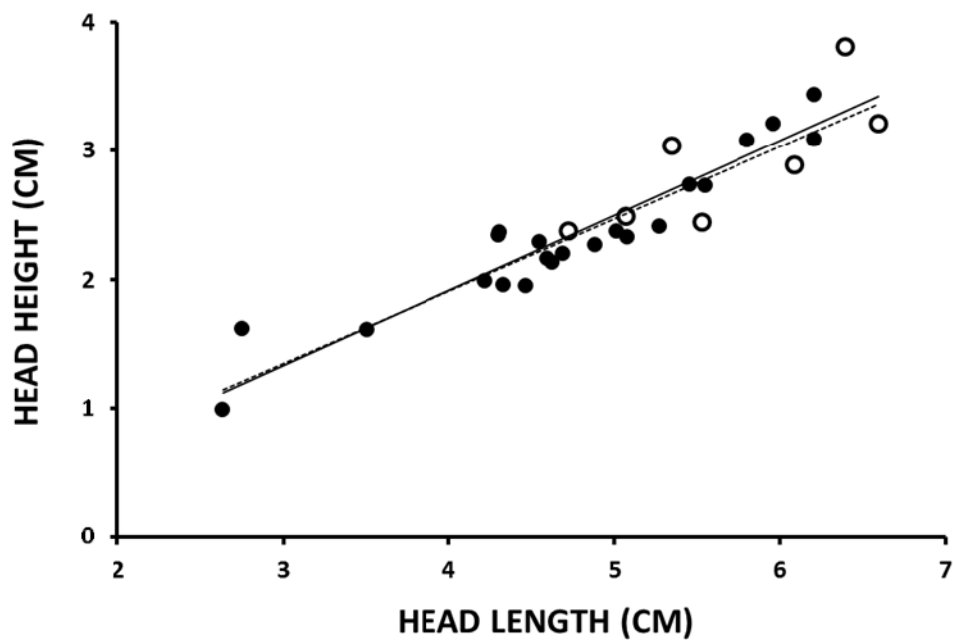

Fig. 6

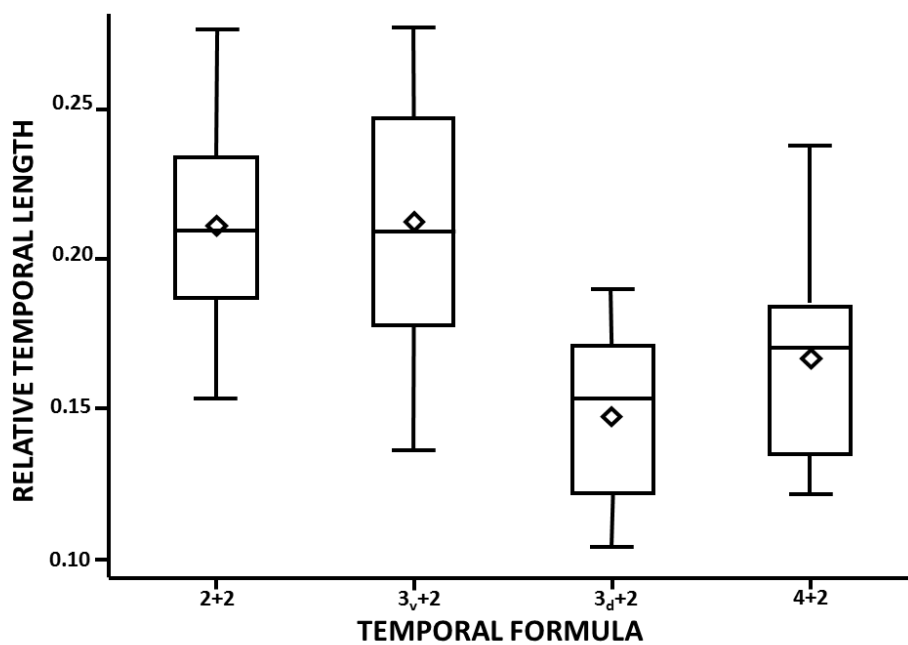

Fig. 7

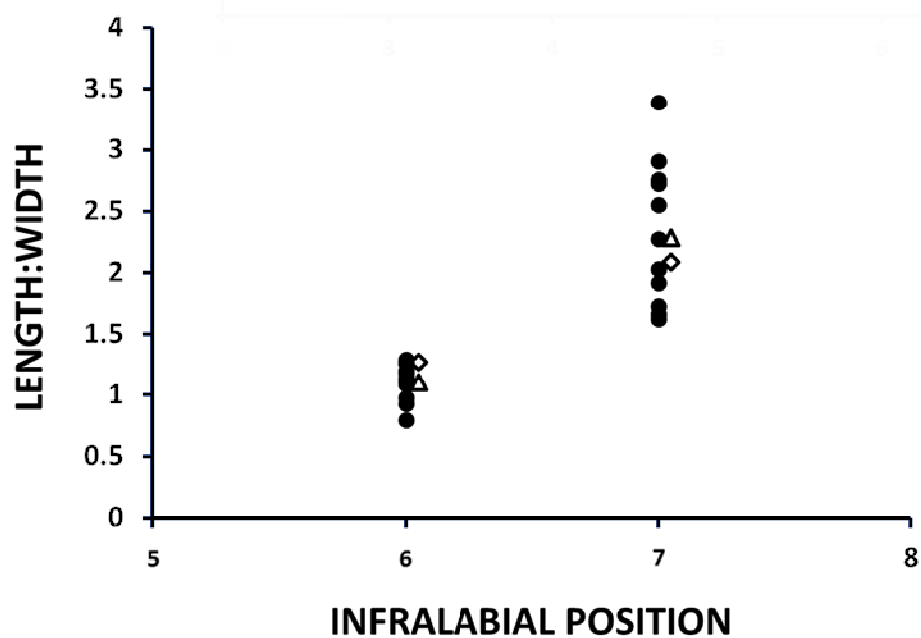

Fig. 8
